# Supplementary material for: Triterpenoids from Kochiae Fructus: Glucose Uptake in 3T3-L1 Adipocytes and α-Glucosidase Inhibition, In Silico Molecular Docking
Source: MDPI journal article supplement (doi:10.3390/ijms24032454), 2023-01-26
Supplement: s1 [file s1]

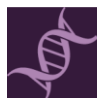

Supplementary Materials

# Triterpenoids from *Kochiae Fructus*: Glucose Uptake in 3T3-L1 Adipocytes and $\alpha$ -Glucosidase Inhibition, in Silico Molecular Docking

Xue-Lin Chen <sup>1,2,†</sup>, Kun Zhang <sup>1,2,†</sup>, Xia Zhao <sup>1</sup>, Han-Lei Wang <sup>1,2</sup>, Mei Han <sup>1,2</sup>, Ru Li <sup>1,2</sup>, Zhen-Nan Zhang <sup>1,2</sup> and Yu-Mei Zhang <sup>1,2,\*</sup>

<sup>1</sup> Key Laboratory of Tropical Plant Resource and Sustainable Use, Xishuangbanna Tropical Botanical Garden, Chinese Academy of Sciences, Kunming 650223, China; chenxuelin@xtbg.ac.cn (X.-L.C.); zhangkun@xtbg.ac.cn (K.Z.); zhaoxia@xtbg.ac.cn (X.Z.); wanghanlei@xtbg.ac.cn (H.-L.W.); hanmei@xtbg.ac.cn (M.H.); liru@xtbg.ac.cn (R.L.); zhangzhennan@xtbg.ac.cn (Z.-N.Z.)

<sup>2</sup> School of Life Science, University of Chinese Academy of Sciences, Beijing 100049, China

\* Correspondence: zyme@xtbg.ac.cn; Tel.: +86-871-6511-2766

† These authors contributed equally to this work.

**Figure S1.** <sup>1</sup>H NMR spectrum of compound 1 (methanol-*d*<sub>4</sub>, 500MHz).

**Figure S2.** <sup>13</sup>C NMR spectrum of compound 1 (methanol-*d*<sub>4</sub>, 125MHz).

**Figure S3.** HSQC spectrum of compound 1.

**Figure S4.** HMBC spectrum of compound 1.

**Figure S5.** <sup>1</sup>H-<sup>1</sup>H COSY spectrum of compound 1.

**Figure S6.** ROESY spectrum of compound 1.

**Figure S7.** HSQC-TOCSY spectrum of compound 1.

**Figure S8.** HRESI-MS spectra of compound 1.

**Figure S9.** Optical rotations spectrum of compound 1.

**Figure S10.** UV spectrum of compound 1.

**Figure S11.** IR spectrum of compound 1.

**Figure S12.** <sup>1</sup>H NMR spectrum of compound 2 (methanol-*d*<sub>4</sub>, 500MHz).

**Figure S13.** <sup>13</sup>C NMR spectrum of compound 2 (methanol-*d*<sub>4</sub>, 125MHz).

**Figure S14.** HSQC spectrum of compound 2.

**Figure S15.** HMBC spectrum of compound 2.

**Figure S16.** <sup>1</sup>H-<sup>1</sup>H COSY spectrum of compound 2.

**Figure S17.** ROESY spectrum of compound 2.

**Figure S18.** HSQC-TOCSY spectrum of compound 2.

**Figure S19.** HRESI-MS spectra of compound 2.

**Figure S20.** Optical rotations spectrum of compound 2.

**Figure S21.** UV spectrum of compound 2.

**Figure S22.** IR spectrum of compound 2.

**Figure S23.** <sup>1</sup>H NMR spectrum of compound 3 (methanol-*d*<sub>4</sub>, 500MHz).

**Figure S24.** <sup>13</sup>C NMR spectrum of compound 3 (methanol-*d*<sub>4</sub>, 125MHz).

**Figure S25.** HSQC spectrum of compound 3.

**Figure S26.** HMBC spectrum of compound 3.

**Figure S27.** <sup>1</sup>H-<sup>1</sup>H COSY spectrum of compound 3.

**Figure S28.** ROESY spectrum of compound 3.

**Figure S29.** HRESI-MS spectra of compound 3.

**Figure S30.** Optical rotations spectrum of compound 3.

**Figure S31.** UV spectrum of compound 3.

**Figure S32.** IR spectrum of compound 3.

**Figure S33.** The CD spectra of compounds 1, 2, and 3 in MeOH.

**Figure S34.** <sup>1</sup>H NMR spectrum of compound 4 (methanol-*d*<sub>4</sub>, 500MHz).

**Figure S35.** <sup>1</sup>H NMR spectrum of compound 5 (methanol-*d*<sub>4</sub>, 500MHz).

**Figure S36.**  $^1\text{H}$  NMR spectrum of compound **6** (methanol- $d_4$ , 500MHz).

**Figure S37.**  $^1\text{H}$  NMR spectrum of compound **7** (methanol- $d_4$ , 500MHz).

**Figure S38.**  $^1\text{H}$  NMR spectrum of compound **8** (methanol- $d_4$ , 500MHz).

**Figure S39.**  $^1\text{H}$  NMR spectrum of compound **9** (methanol- $d_4$ , 500MHz).

**Figure S40.**  $^1\text{H}$  NMR spectrum of compound **10** (methanol- $d_4$ , 600MHz).

**Figure S41.**  $^1\text{H}$  NMR spectrum of compound **11** (methanol- $d_4$ , 500MHz).

**Figure S42.**  $^1\text{H}$  NMR spectrum of compound **12** (methanol- $d_4$ , 500MHz).

**Figure S43.**  $^1\text{H}$  NMR spectrum of compound **13** (methanol- $d_4$ , 600MHz).

**Figure S44.**  $^1\text{H}$  NMR spectrum of compound **14** (methanol- $d_4$ , 600MHz).

**Figure S45.**  $^1\text{H}$  NMR spectrum of compound **15** (methanol- $d_4$ , 600MHz).

**Figure S46.**  $^1\text{H}$  NMR spectrum of compound **16** (methanol- $d_4$ , 600MHz).

**Figure S47.**  $^1\text{H}$  NMR spectrum of compound **17** (methanol- $d_4$ , 600MHz).

**Table S1.** The data that was used to calculate the  $\text{IC}_{50}$  value for compound **3**.

**Table S2.** The data that was used to calculate the  $\text{IC}_{50}$  value for compound **9**.

**Table S3.** The data that was used to calculate the  $\text{IC}_{50}$  value for compound **13**.

**Table S4.** The data that was used to calculate the  $\text{IC}_{50}$  value for acarbose.

**Table S5.** The data that was used to calculate the  $K_m$ ,  $K_i$ , and  $K_i'$  value for compound **3**.

**Table S6.** The data that was used to calculate the  $K_m$ ,  $K_i$ , and  $K_i'$  value for compound **9**.

**Table S7.** The data that was used to calculate the  $K_m$ ,  $K_i$ , and  $K_i'$  value for compound **13**.

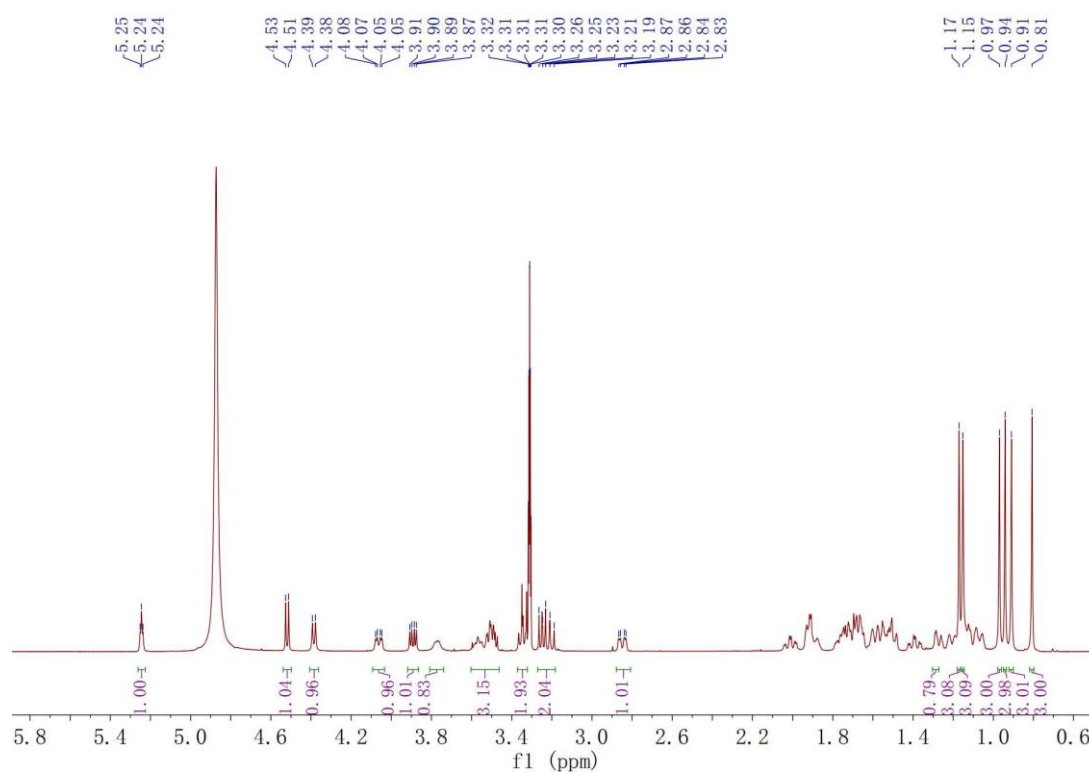

Figure S1. <sup>1</sup>H NMR spectrum of compound 1 (methanol-*d*<sub>4</sub>, 500 MHz).

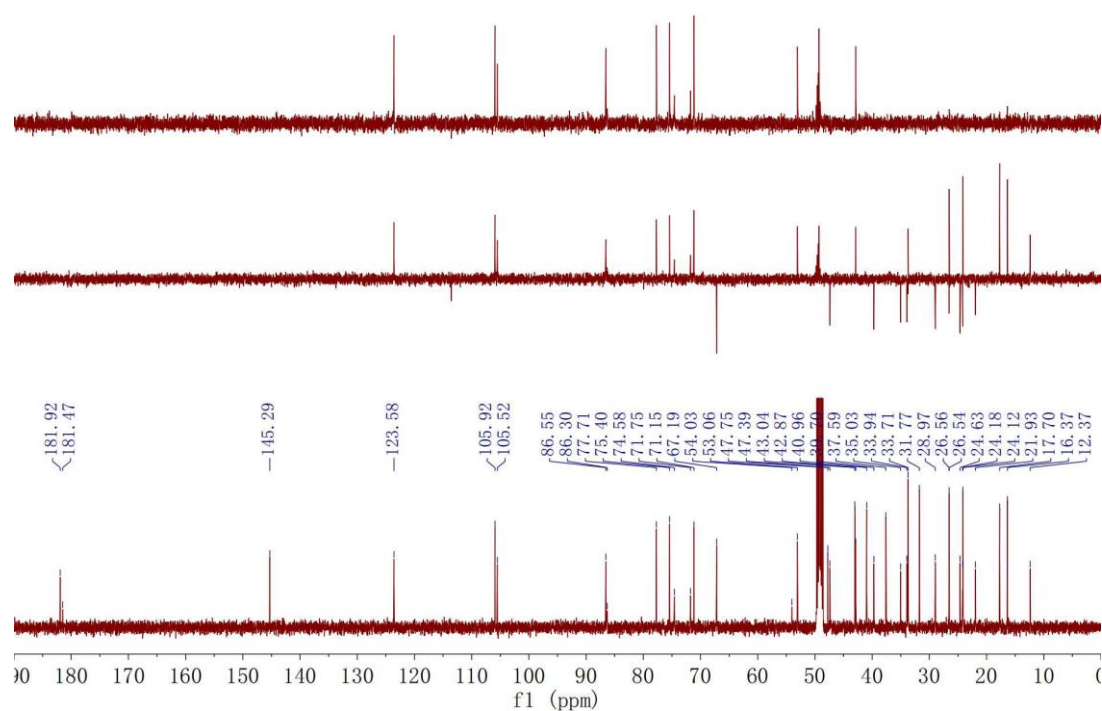

Figure S2. <sup>13</sup>C NMR spectrum of compound 1 (methanol-*d*<sub>4</sub>, 125 MHz).

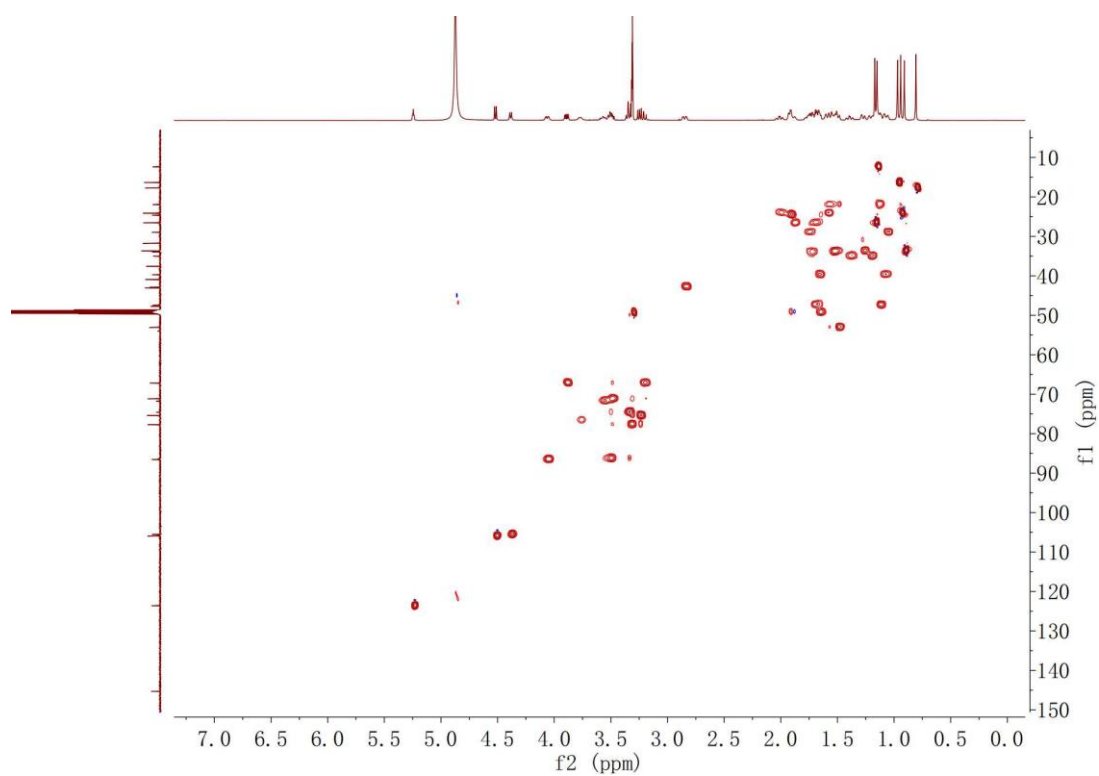

Figure S3. HSQC spectrum of compound 1.

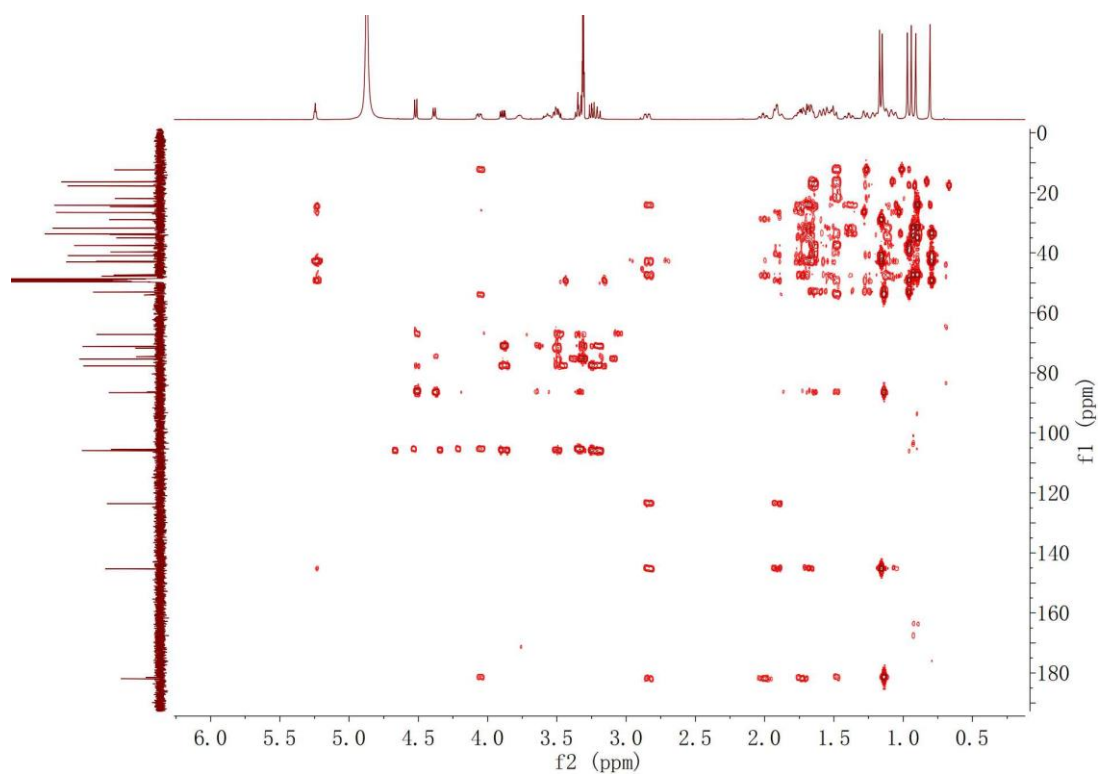

Figure S4. HMBC spectrum of compound 1.

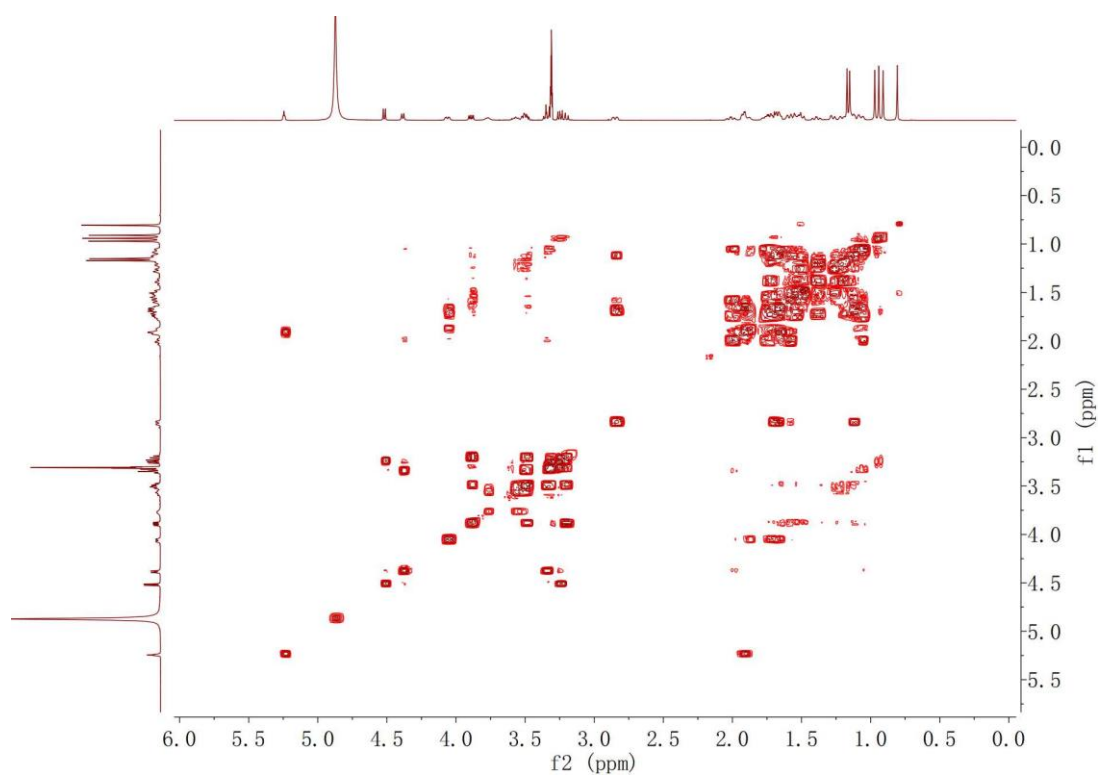

Figure S5.  $^1\text{H}$ - $^1\text{H}$  COSY spectrum of compound **1**.

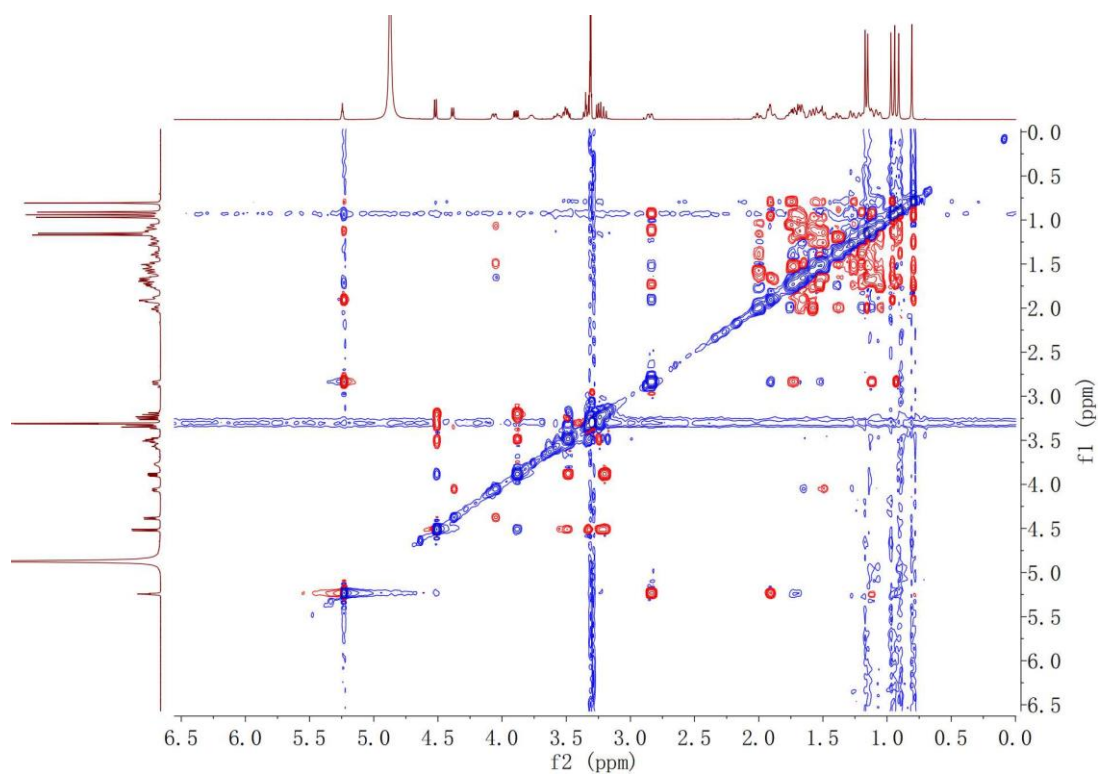

Figure S6. ROESY spectrum of compound **1**.

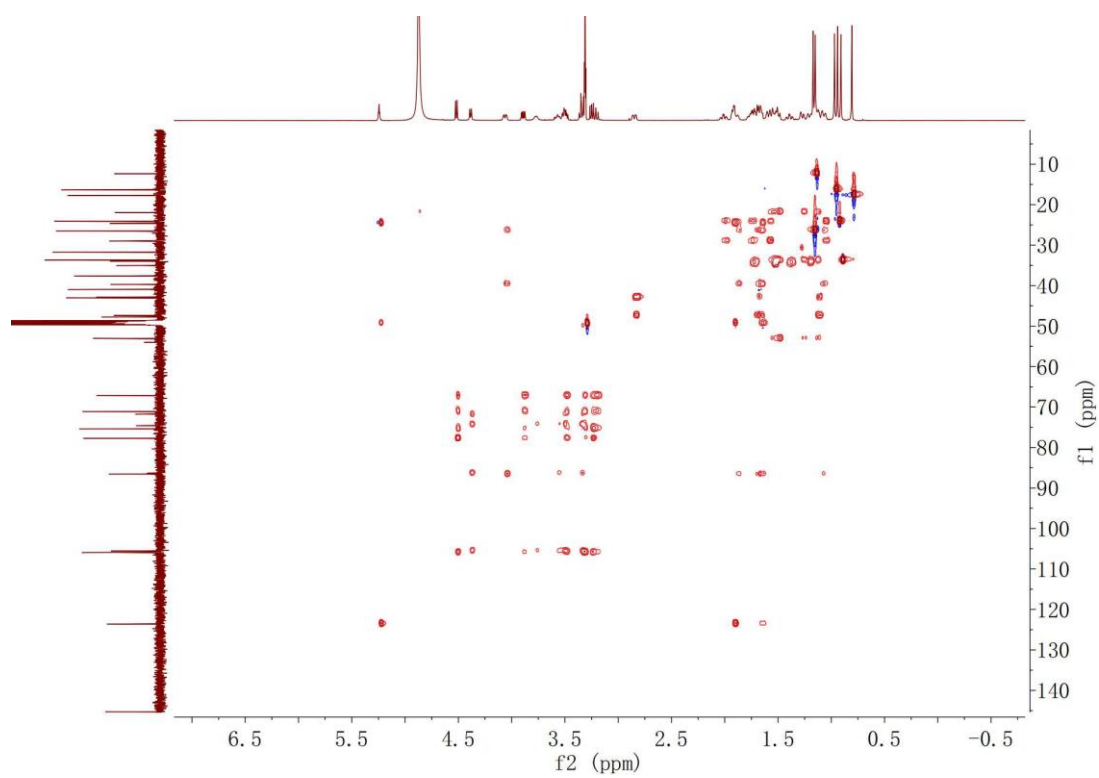

**Figure S7.** HSQC-TOCSY spectrum of compound 1.

Formula Predictor Report - ZKF22.lcd

Page 1 of 1

Data File: E:\DATA\2022\0518\ZKF22.lcd

| Elmt | Val. | Min | Max | Use Adduct |
|------|------|-----|-----|------|------|-----|-----|------|------|-----|-----|------|------|-----|-----|------------|
| H    | 1    | 5   | 100 | F    | 1    | 0   | 0   | Cl   | 1    | 0   | 0   | Ag   | 1    | 0   | 0   | H          |
| 2H   | 1    | 0   | 0   | Na   | 1    | 0   | 0   | Co   | 2    | 0   | 0   | I    | 3    | 0   | 0   |            |
| B    | 3    | 0   | 0   | Mg   | 2    | 0   | 0   | Cu   | 2    | 0   | 0   | Ir   | 3    | 0   | 0   |            |
| C    | 4    | 10  | 50  | Si   | 4    | 0   | 0   | Se   | 2    | 0   | 0   |      |      |     |     |            |
| N    | 3    | 0   | 0   | P    | 3    | 0   | 0   | Br   | 1    | 0   | 0   |      |      |     |     |            |
| O    | 2    | 0   | 30  | S    | 2    | 0   | 0   | Pd   | 2    | 0   | 0   |      |      |     |     |            |

Error Margin (ppm): 5

DBE Range: not fixed

Electron Ions: both

HC Ratio: unlimited

Apply N Rule: no

Use MSn Info: yes

Max Isotopes: all

Isotope RI (%): 1.00

Isotope Res: 10000

MSn Iso RI (%): 75.00

MSn Logic Mode: OR

Max Results: 30

Event#: 2 MS(E-) Ret. Time : 0.400 -&gt; 0.893 Scan#: 62 -&gt; 136

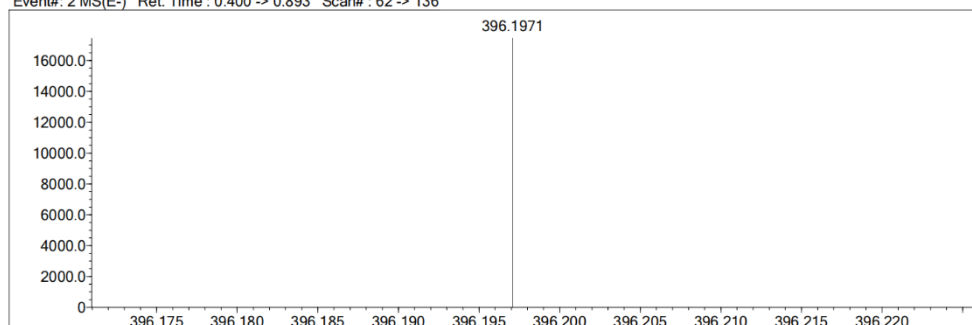

Measured region for 396.1971 m/z

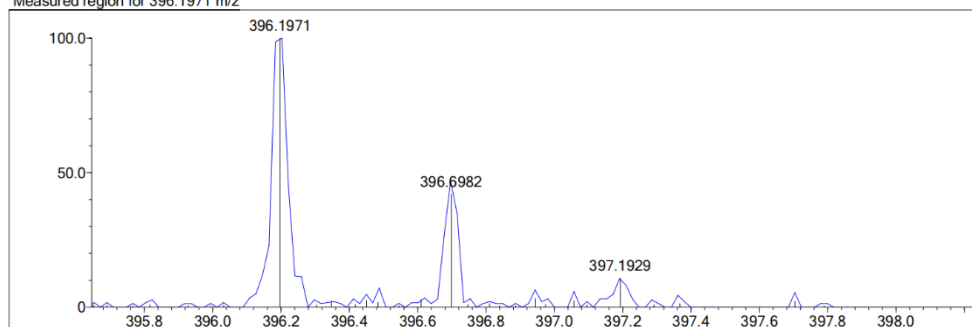

C41 H62 O15 [M-2H]2- : Predicted region for 396.1972 m/z

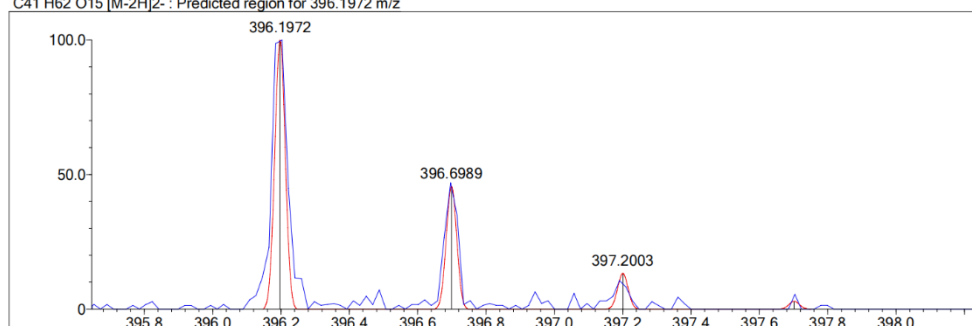

| Formula (M) | Ion      | Meas. m/z | Pred. m/z | Df. (mDa) | Df. (ppm) | DBE  |
|-------------|----------|-----------|-----------|-----------|-----------|------|
| C41 H62 O15 | [M-2H]2- | 396.1971  | 396.1972  | -0.1      | -0.25     | 11.0 |

Figure S8. HRESI-MS spectra of compound 1.

**Rudolph Research Analytical**

This sample was measured on an Autopol VI, Serial #91058  
Manufactured by Rudolph Research Analytical, Hackettstown, NJ, USA.

Measurement Date : Tuesday, 31-MAY-2022

Set Temperature : OFF

Time Delay : Disabled

Delay between Measurement : Disabled

| n    | Average   | Std.Dev.    | % RSD  | Maximum | Minimum |        |        |              |       |
|------|-----------|-------------|--------|---------|---------|--------|--------|--------------|-------|
| 5    | 17.22     | 0.58        | 3.36   | 18.18   | 16.58   |        |        |              |       |
| S.No | Sample ID | Time        | Result | Scale   | OR °Arc | WLG.nm | Lg.mm  | Conc.g/100ml | Temp. |
| 1    | ZKF-22    | 06:55:35 PM | 17.11  | SR      | 0.032   | 589    | 100.00 | 0.187        | 25.1  |
| 2    | ZKF-22    | 06:55:42 PM | 16.58  | SR      | 0.031   | 589    | 100.00 | 0.187        | 25.1  |
| 3    | ZKF-22    | 06:55:48 PM | 17.11  | SR      | 0.032   | 589    | 100.00 | 0.187        | 25.1  |
| 4    | ZKF-22    | 06:55:54 PM | 17.11  | SR      | 0.032   | 589    | 100.00 | 0.187        | 25.0  |
| 5    | ZKF-22    | 06:56:01 PM | 18.18  | SR      | 0.034   | 589    | 100.00 | 0.187        | 25.0  |

Figure S9. Optical rotations spectrum of compound 1.

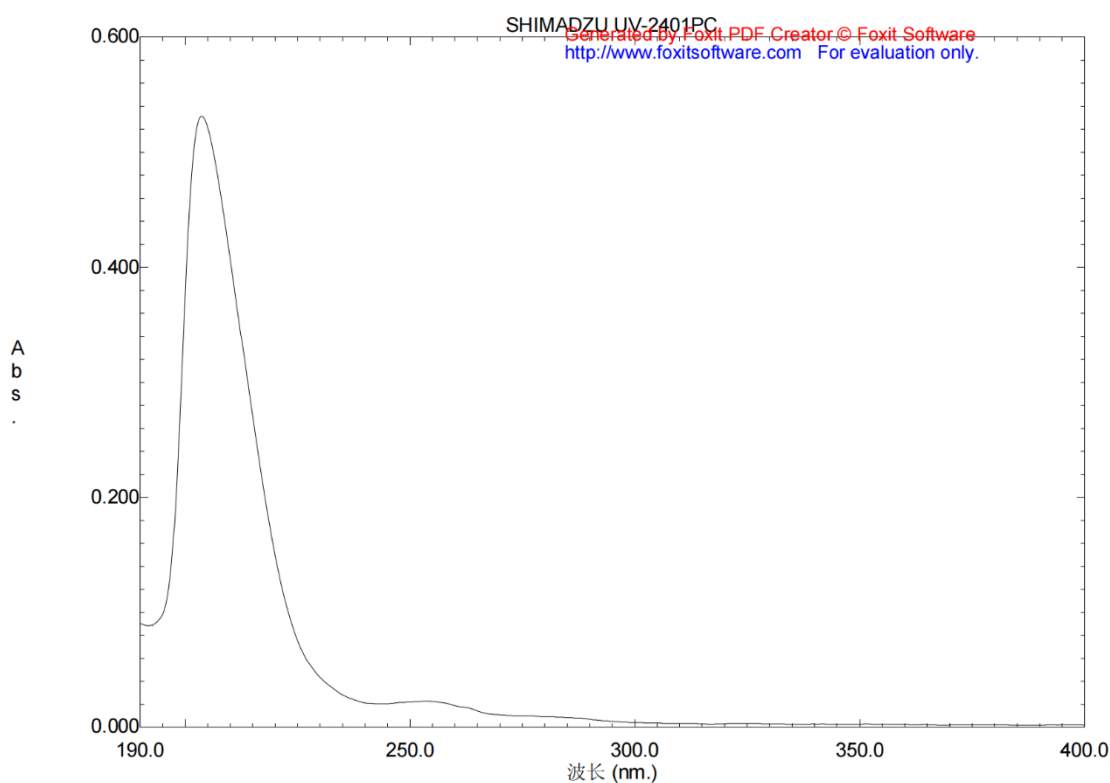

文件名: ZKF-22

ZKF-22

创建于: 20:17 22-06-01

数据: 原始

样品浓度: 0.0748毫克/毫升

溶剂: 甲醇

测量模式: Abs.

扫描速度: 中速

狭缝: 5.0

采样间隔: 0.2

| 否. | 波长 (nm.) | Abs.   |
|----|----------|--------|
| 1  | 253.20   | 0.0224 |
| 2  | 203.60   | 0.5311 |

Figure S10. UV spectrum of compound 1.



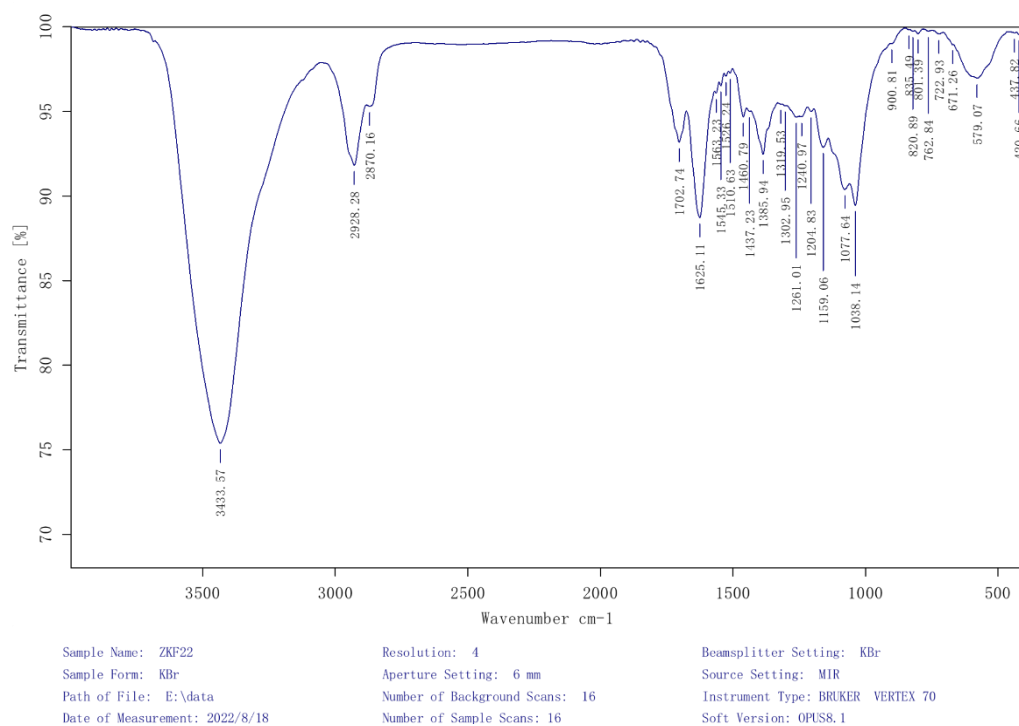

Figure S11. IR spectrum of compound 1.

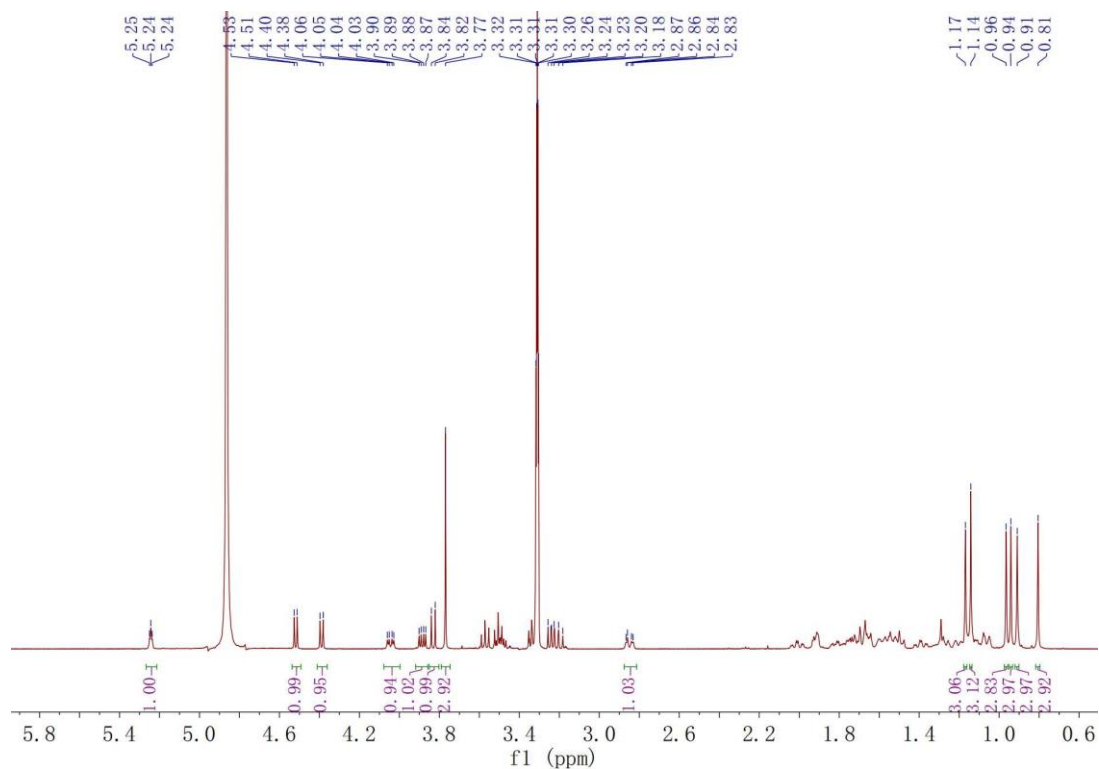Figure S12. <sup>1</sup>H NMR spectrum of compound 2 (methanol-*d*<sub>4</sub>, 500MHz).

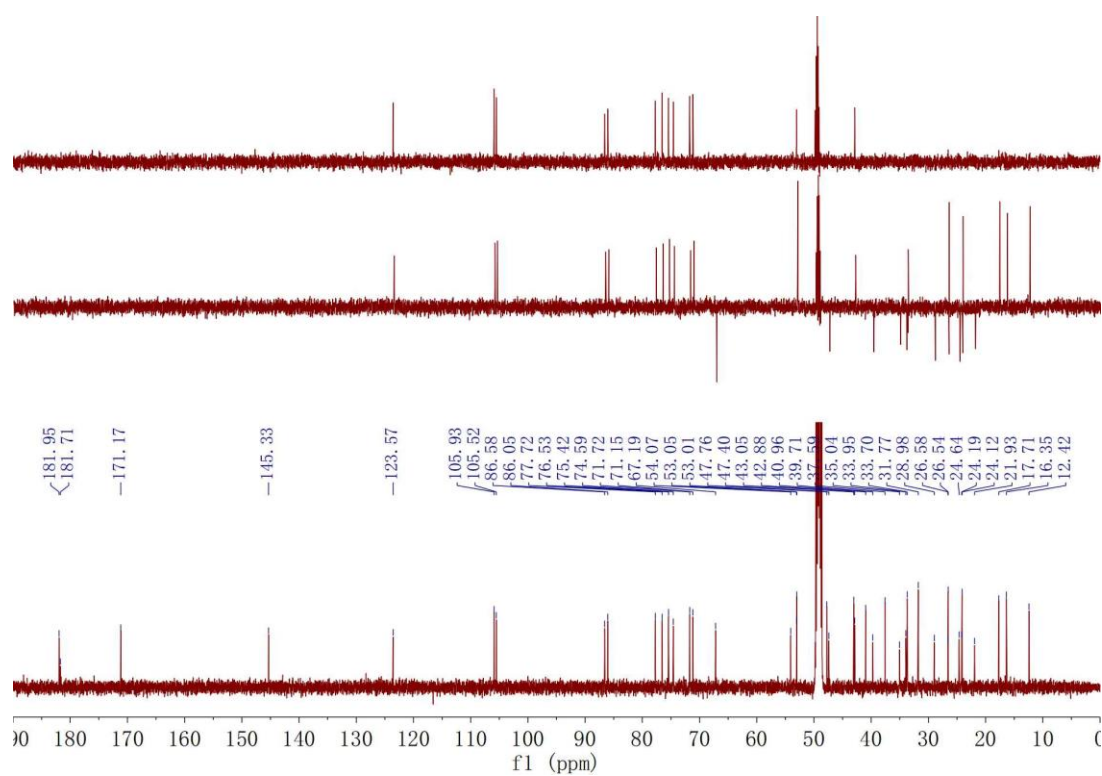

Figure S13. <sup>13</sup>C NMR spectrum of compound 2 (methanol-*d*<sub>4</sub>, 125MHz).

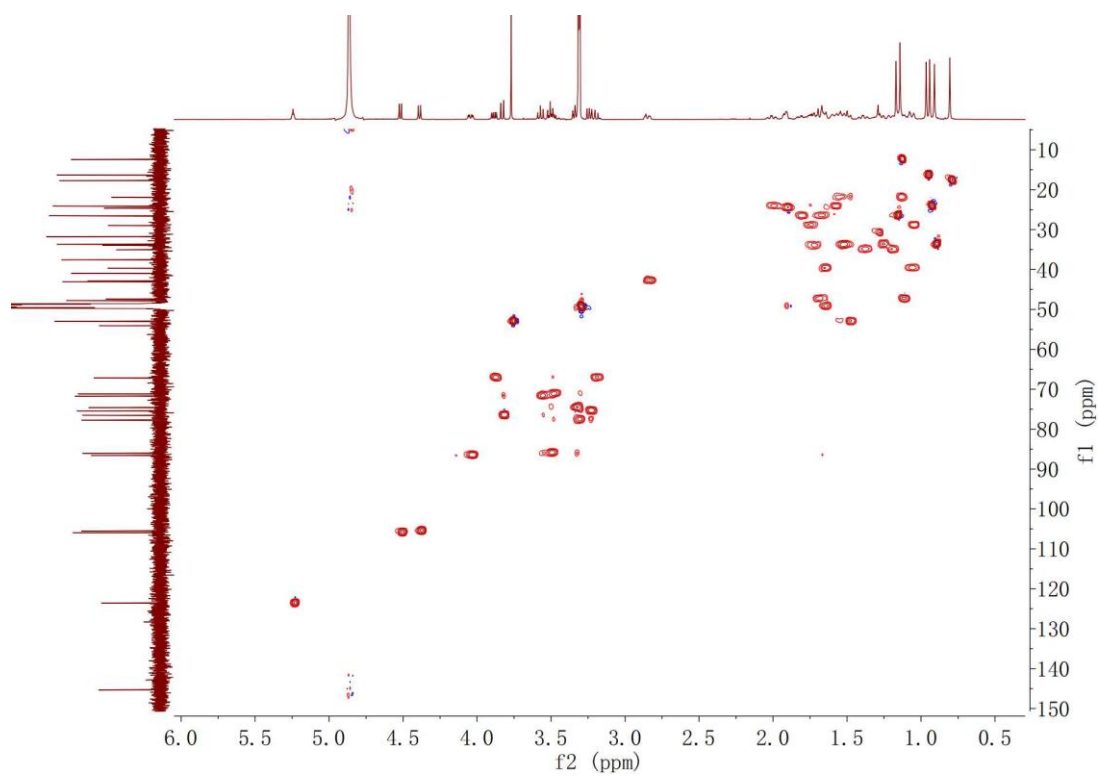

Figure S14. HSQC spectrum of compound 2.

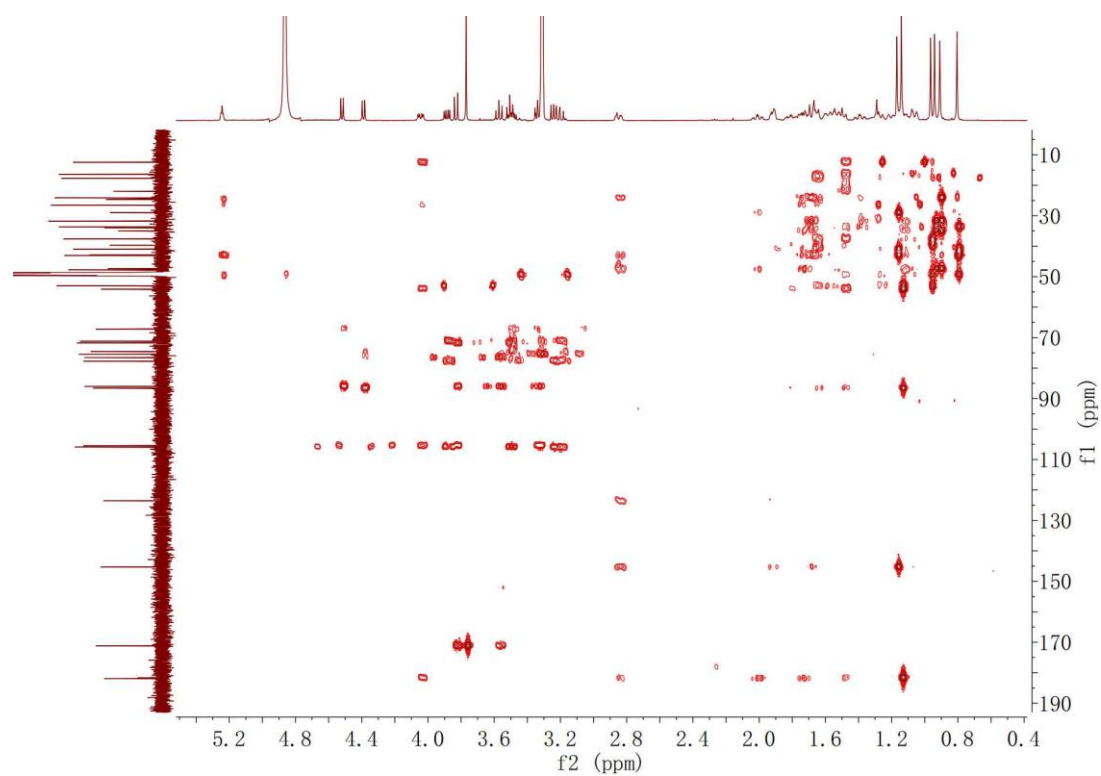

Figure S15. HMBC spectrum of compound 2.

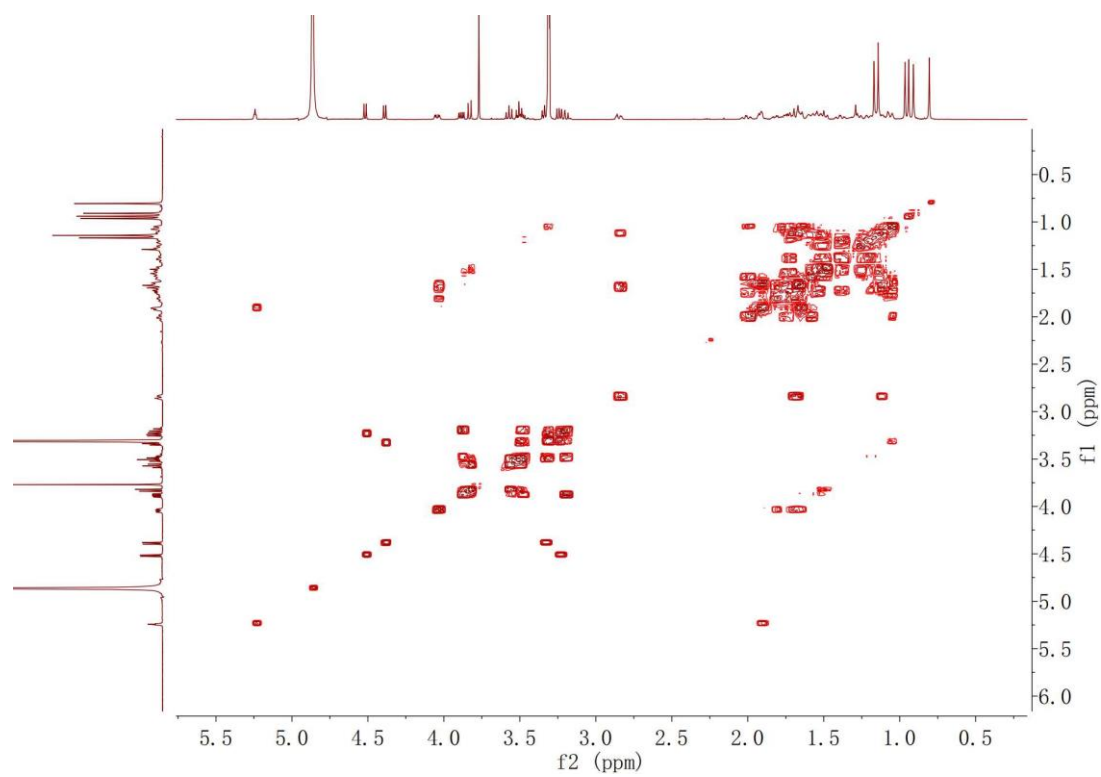

Figure S16.  $^1\text{H}$ - $^1\text{H}$  COSY spectrum of compound 2.

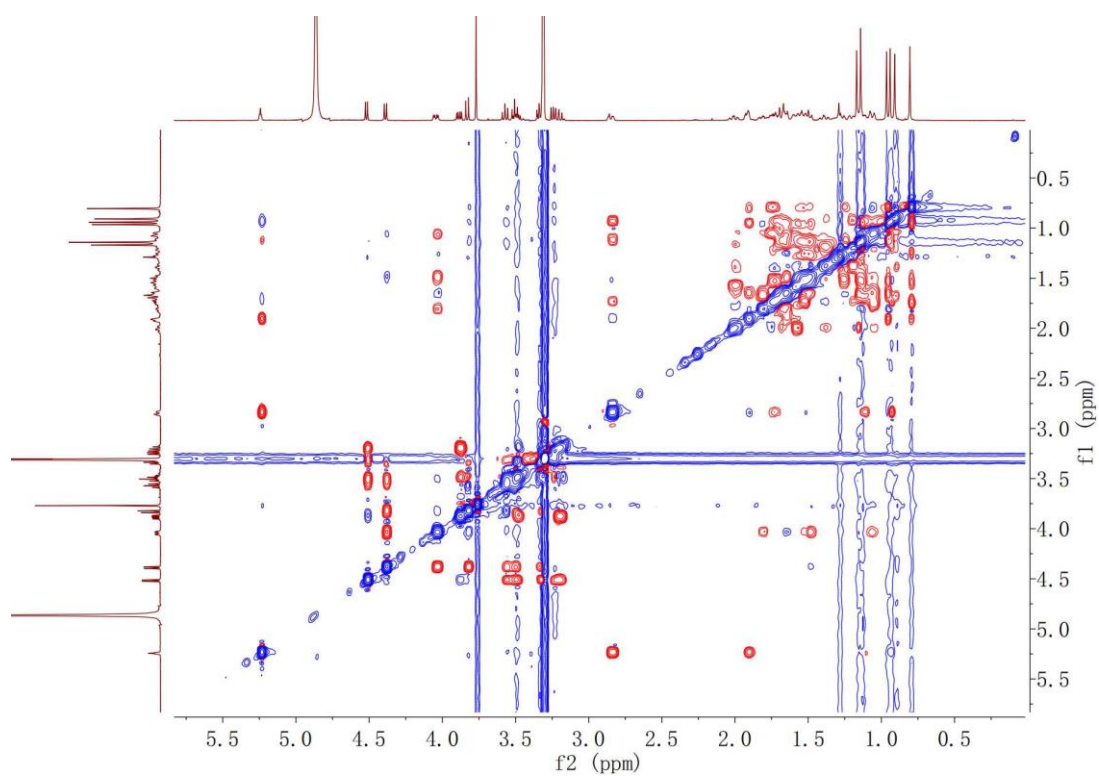

Figure S17. ROESY spectrum of compound 2.

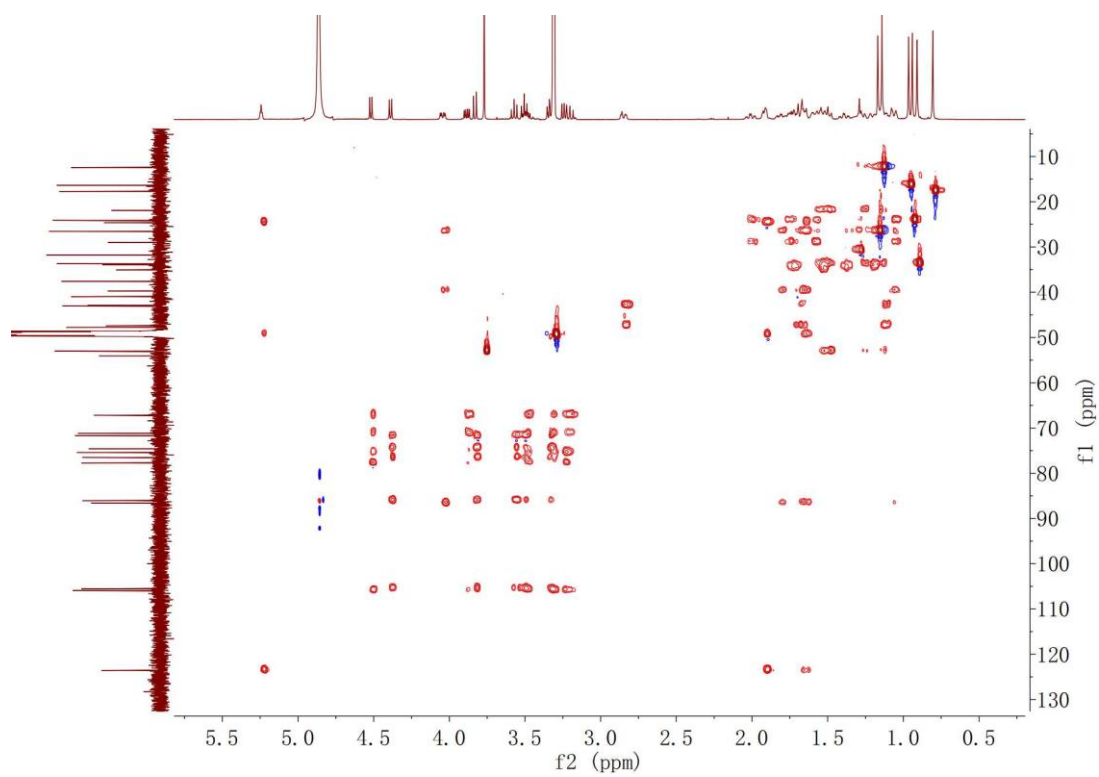

Figure S18. HSQC-TOCSY spectrum of compound 2.

Formula Predictor Report - ZKF31.lcd

Page 1 of 1

Data File: E:\DATA\2022\0518\ZKF31.lcd

| Elmt | Val. | Min | Max | Use Adduct |
|------|------|-----|-----|------|------|-----|-----|------|------|-----|-----|------|------|-----|-----|------------|
| H    | 1    | 5   | 100 | F    | 1    | 0   | 0   | Cl   | 1    | 0   | 0   | Ag   | 1    | 0   | 0   | H          |
| 2H   | 1    | 0   | 0   | Na   | 1    | 0   | 0   | Co   | 2    | 0   | 0   | I    | 3    | 0   | 0   |            |
| B    | 3    | 0   | 0   | Mg   | 2    | 0   | 0   | Cu   | 2    | 0   | 0   | Ir   | 3    | 0   | 0   |            |
| C    | 4    | 10  | 50  | Si   | 4    | 0   | 0   | Se   | 2    | 0   | 0   |      |      |     |     |            |
| N    | 3    | 0   | 20  | P    | 3    | 0   | 0   | Br   | 1    | 0   | 0   |      |      |     |     |            |
| O    | 2    | 0   | 30  | S    | 2    | 0   | 0   | Pd   | 2    | 0   | 0   |      |      |     |     |            |

Error Margin (ppm): 58

HC Ratio: unlimited

Max Isotopes: all

MSn Iso RI (%): 75.00

DBE Range: not fixed

Apply N Rule: no

Isotope RI (%): 1.00

MSn Logic Mode: OR

Electron Ions: both

Use MSn Info: yes

Isotope Res: 10000

Max Results: 30

Event#: 2 MS(E-) Ret. Time : 0.400 -&gt; 0.440 Scan#: 62 -&gt; 68

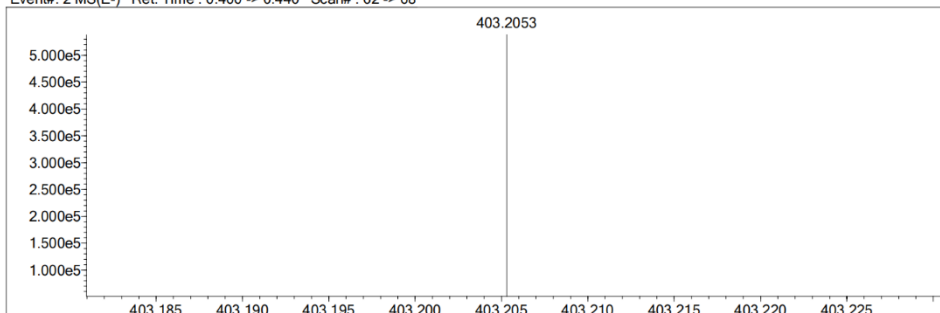

Measured region for 403.2053 m/z

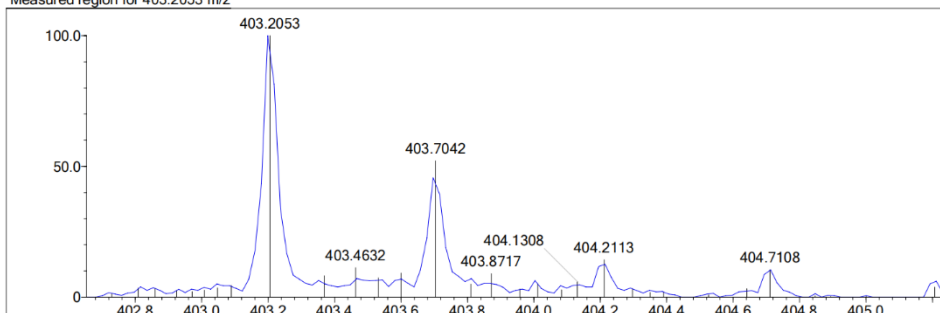

C42 H64 O15 [M-2H]2- : Predicted region for 403.2050 m/z

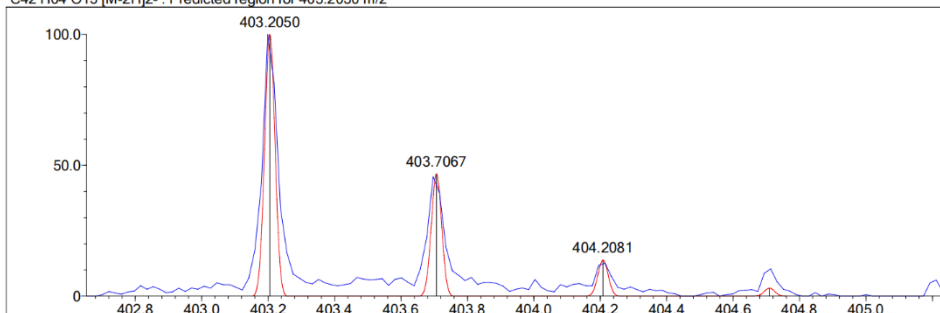

| Formula (M) | Ion      | Meas. m/z | Pred. m/z | Df. (mDa) | Df. (ppm) | DBE  |
|-------------|----------|-----------|-----------|-----------|-----------|------|
| C42 H64 O15 | [M-2H]2- | 403.2053  | 403.2050  | 0.3       | 0.74      | 11.0 |

Figure S19. HRESI-MS spectra of compound 2.

**Rudolph Research Analytical**

This sample was measured on an Autopol VI, Serial #91058  
Manufactured by Rudolph Research Analytical, Hackettstown, NJ, USA.

Measurement Date : Tuesday, 31-MAY-2022

Set Temperature : OFF

Time Delay : Disabled

Delay between Measurement : Disabled

| <u>n</u> | <u>Average</u> | <u>Std.Dev.</u> | <u>% RSD</u> | <u>Maximum</u> | <u>Minimum</u> |
|----------|----------------|-----------------|--------------|----------------|----------------|
| 5        | 4.31           | 0.59            | 13.68        | 5.06           | 3.48           |

| <u>S.No</u> | <u>Sample ID</u> | <u>Time</u> | <u>Result</u> | <u>Scale</u> | <u>OR °Arc</u> | <u>WLG.nm</u> | <u>Lg.mm</u> | <u>Conc.g/100ml</u> | <u>Temp.</u> |
|-------------|------------------|-------------|---------------|--------------|----------------|---------------|--------------|---------------------|--------------|
| 1           | ZKF-31           | 07:03:52 PM | 5.06          | SR           | 0.0045         | 589           | 100.00       | 0.089               | 25.2         |
| 2           | ZKF-31           | 07:04:01 PM | 4.04          | SR           | 0.0036         | 589           | 100.00       | 0.089               | 25.2         |
| 3           | ZKF-31           | 07:04:09 PM | 4.49          | SR           | 0.0040         | 589           | 100.00       | 0.089               | 25.2         |
| 4           | ZKF-31           | 07:04:17 PM | 4.49          | SR           | 0.0040         | 589           | 100.00       | 0.089               | 25.1         |
| 5           | ZKF-31           | 07:04:25 PM | 3.48          | SR           | 0.0031         | 589           | 100.00       | 0.089               | 25.1         |

**Figure S20.** Optical rotations spectrum of compound 2.

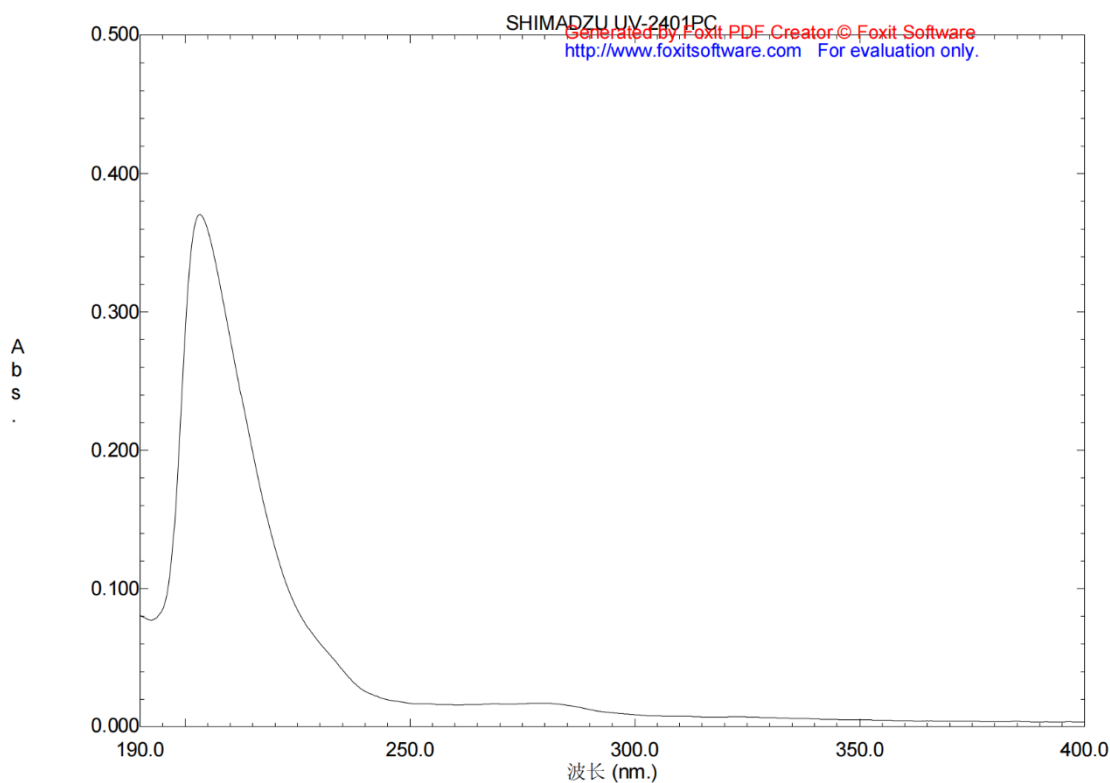

文件名: ZKF-31

ZKF-31

创建于: 20:23 22-06-01

数据: 原始

样品浓度: 0.0356毫克/毫升  
溶剂: 甲醇

测量模式: Abs.

扫描速度: 中速

狭缝: 5.0

采样间隔: 0.2

| 否. | 波长 (nm.) | Abs.   |
|----|----------|--------|
| 1  | 279.40   | 0.0169 |
| 2  | 203.20   | 0.3704 |

**Figure S21.** UV spectrum of compound 2.

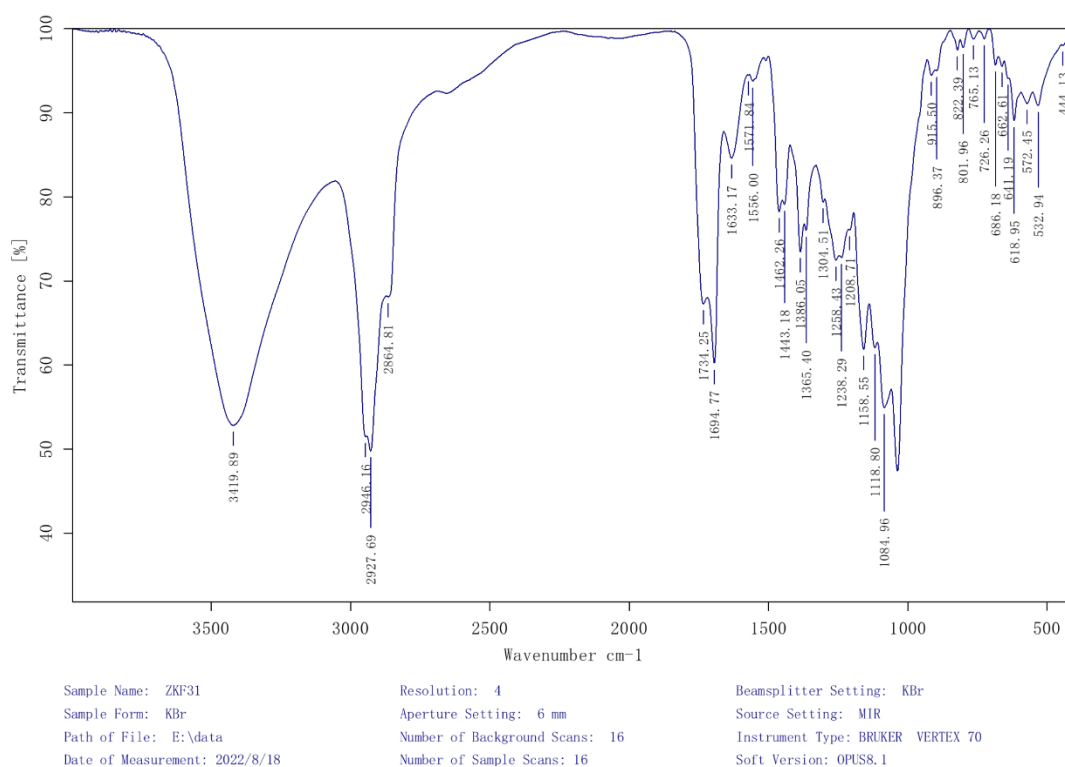

Figure S22. IR spectrum of compound 2.

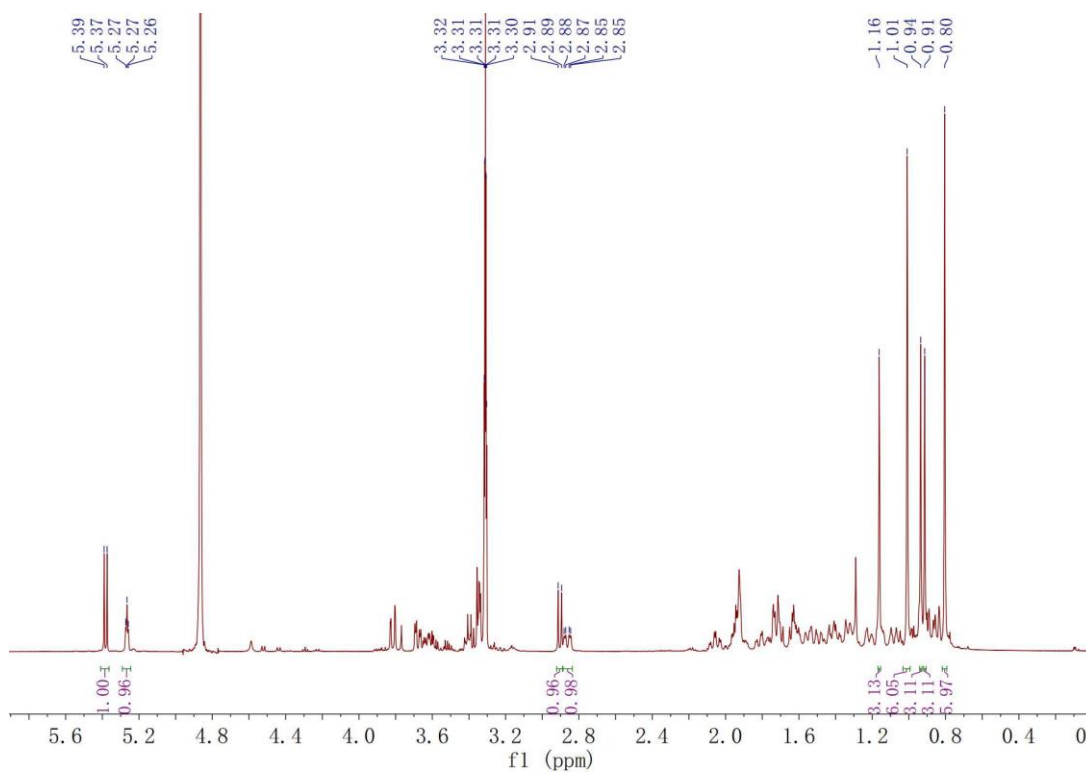Figure S23.  $^1\text{H}$  NMR spectrum of compound 3 (methanol- $d_4$ , 500 MHz).



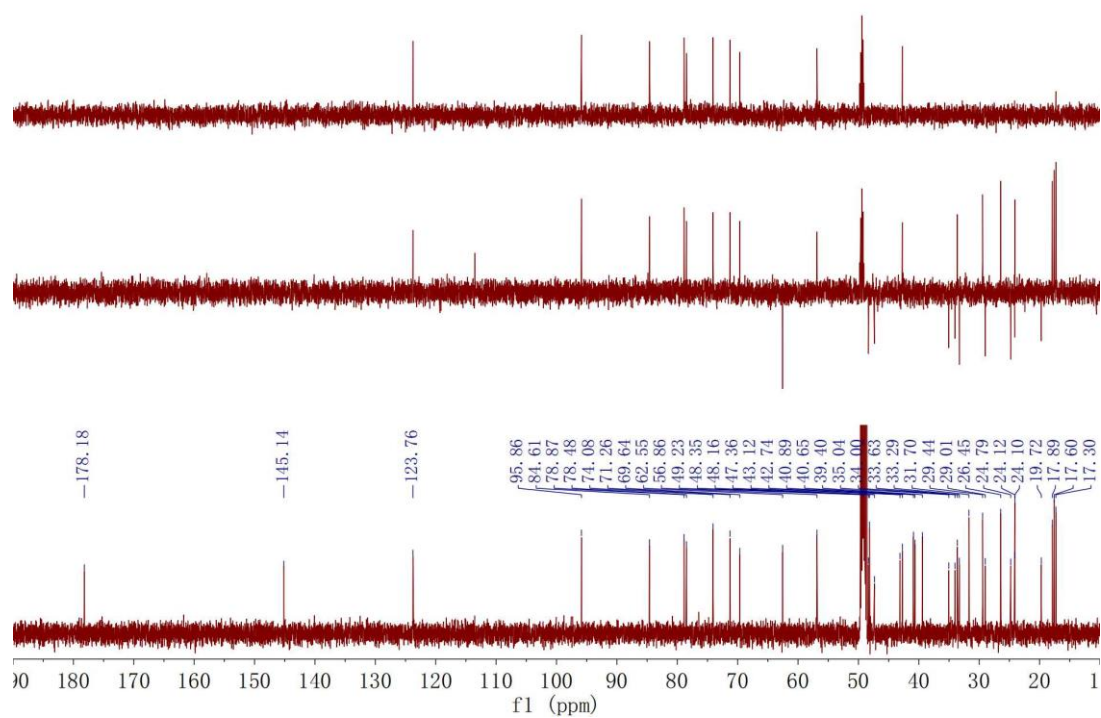

Figure S24. <sup>13</sup>C NMR spectrum of compound 3 (methanol-*d*<sub>4</sub>, 125MHz).

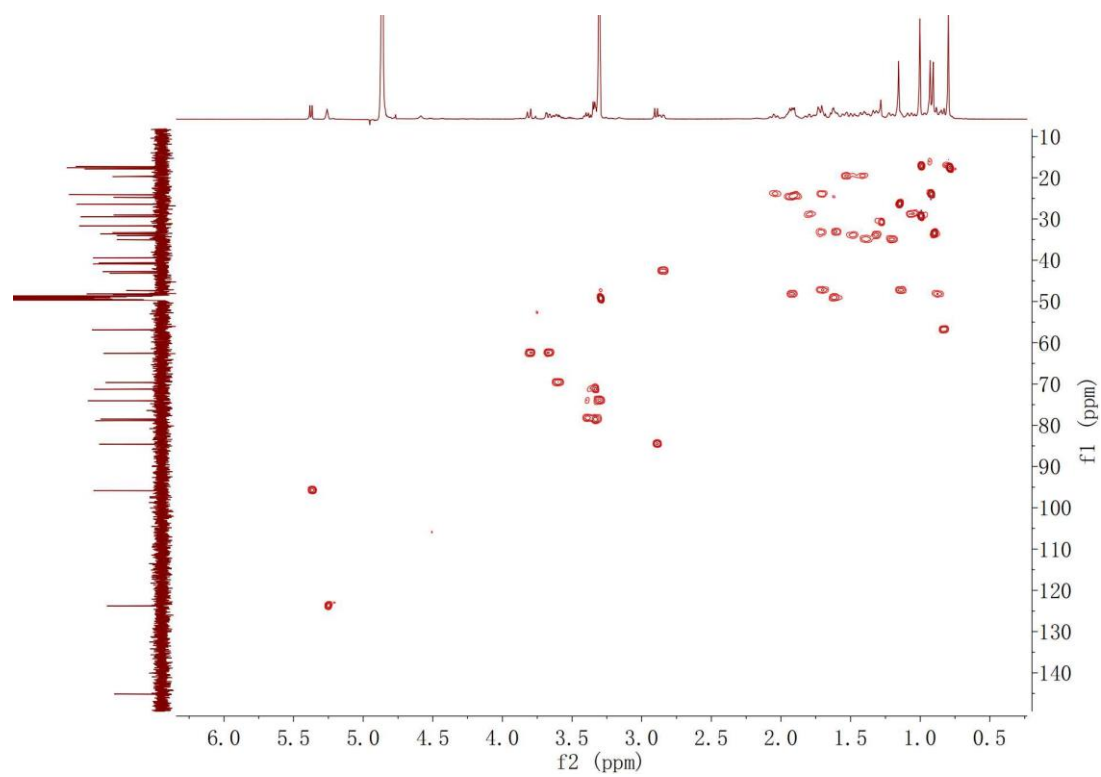

Figure S25. HSQC spectrum of compound 3.



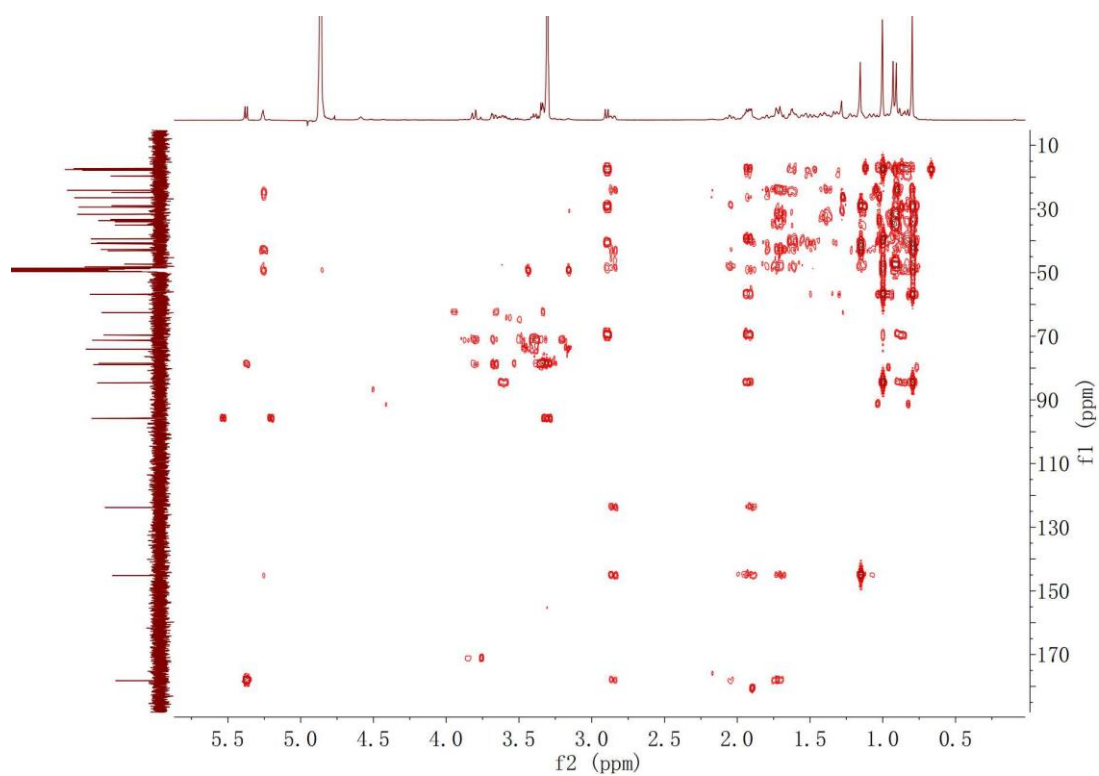

Figure S26. HMBC spectrum of compound 3.

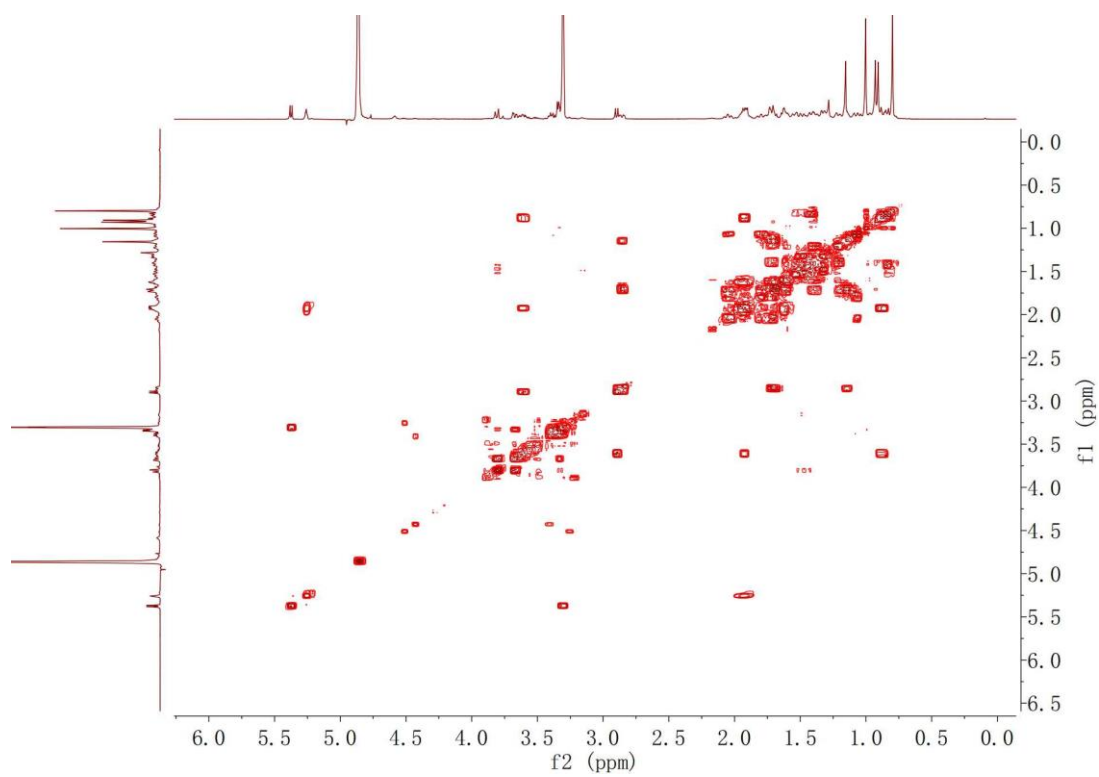

Figure S27.  $^1\text{H}$ - $^1\text{H}$  COSY spectrum of compound 3.

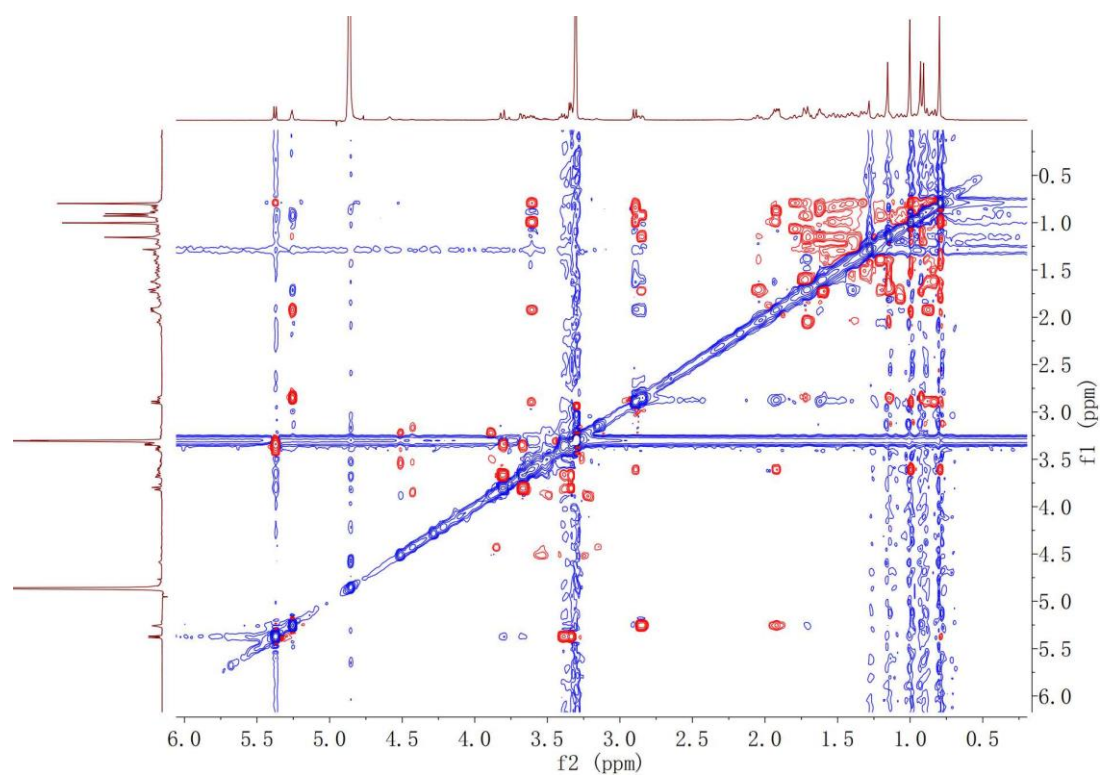

**Figure S28.** ROESY spectrum of compound 3.

Formula Predictor Report - ZKF17.lcd

Page 1 of 1

Data File: E:\DATA\2022\1021\1\ZKF17.lcd

| Elmt | Val. | Min | Max | Use Adduct |
|------|------|-----|-----|------|------|-----|-----|------|------|-----|-----|------|------|-----|-----|------------|
| H    | 1    | 5   | 100 | F    | 1    | 0   | 0   | Cl   | 1    | 0   | 0   | Ag   | 1    | 0   | 0   | H          |
| 2H   | 1    | 0   | 0   | Na   | 1    | 0   | 0   | Co   | 2    | 0   | 0   | I    | 3    | 0   | 0   | Na         |
| B    | 3    | 0   | 0   | Mg   | 2    | 0   | 0   | Cu   | 2    | 0   | 0   | Ir   | 3    | 0   | 0   |            |
| C    | 4    | 10  | 60  | Si   | 4    | 0   | 0   | Se   | 2    | 0   | 0   |      |      |     |     |            |
| N    | 3    | 0   | 10  | P    | 3    | 0   | 0   | Br   | 1    | 0   | 0   |      |      |     |     |            |
| O    | 2    | 0   | 30  | S    | 2    | 0   | 0   | Pd   | 2    | 0   | 0   |      |      |     |     |            |

Error Margin (ppm): 5

HC Ratio: unlimited

Max Isotopes: all

MSn Iso RI (%): 75.00

DBE Range: not fixed

Apply N Rule: no

Isotope RI (%): 1.00

MSn Logic Mode: OR

Electron Ions: both

Use MSn Info: yes

Isotope Res: 10000

Max Results: 30

Event#: 1 MS(E+) Ret. Time : 0.187 -&gt; 0.787 Scan#: 29 -&gt; 119

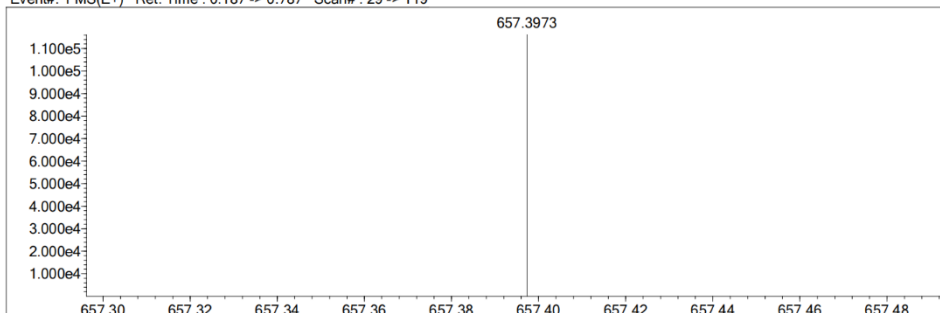

Measured region for 657.3973 m/z

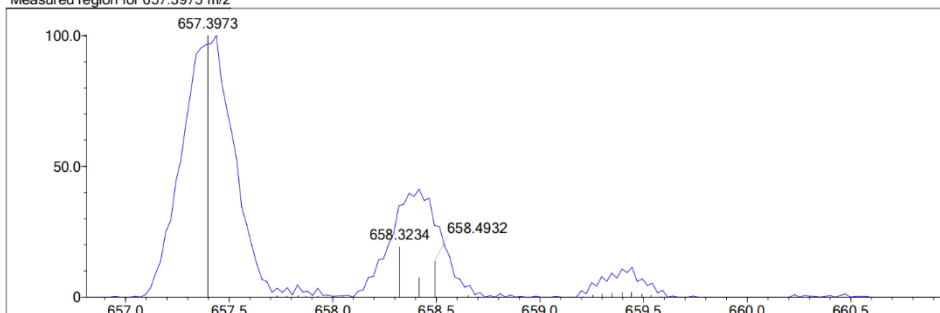

C36 H58 O9 [M+Na]+ : Predicted region for 657.3973 m/z

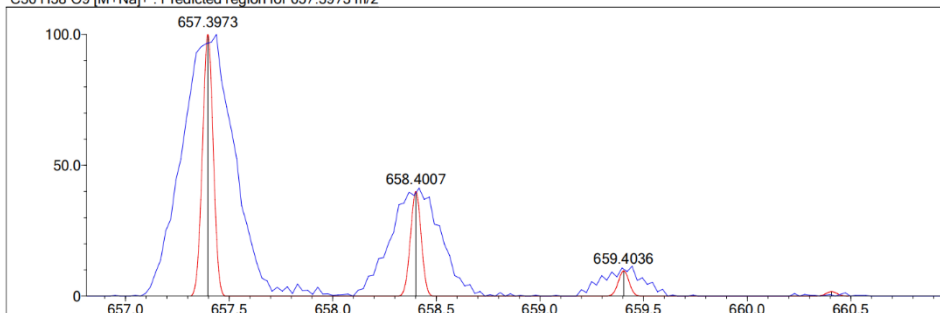

| Formula (M) | Ion     | Meas. m/z | Pred. m/z | Df. (mDa) | Df. (ppm) | DBE |
|-------------|---------|-----------|-----------|-----------|-----------|-----|
| C36 H58 O9  | [M+Na]+ | 657.3973  | 657.3973  | -0.0      | 0.00      | 8.0 |

Figure S29. HRESI-MS spectra of compound 3.

**Rudolph Research Analytical**

This sample was measured on an Autopol VI, Serial #91058  
Manufactured by Rudolph Research Analytical, Hackettstown, NJ, USA.

Measurement Date : Monday, 17-OCT-2022

Set Temperature : OFF

Time Delay : Disabled

Delay between Measurement : Disabled

| <u>n</u>    | <u>Average</u>   | <u>Std.Dev.</u> | <u>% RSD</u>  | <u>Maximum</u> | <u>Minimum</u> |               |              |                     |              |  |
|-------------|------------------|-----------------|---------------|----------------|----------------|---------------|--------------|---------------------|--------------|--|
| 5           | 23.14            | 0.64            | 2.76          | 23.84          | 22.67          |               |              |                     |              |  |
| <u>S.No</u> | <u>Sample ID</u> | <u>Time</u>     | <u>Result</u> | <u>Scale</u>   | <u>OR °Arc</u> | <u>WLG.nm</u> | <u>Lg.mm</u> | <u>Conc.g/100ml</u> | <u>Temp.</u> |  |
| 1           | ZKF17            | 07:15:53 PM     | 23.84         | SR             | 0.041          | 589           | 100.00       | 0.172               | 18.6         |  |
| 2           | ZKF17            | 07:15:59 PM     | 22.67         | SR             | 0.039          | 589           | 100.00       | 0.172               | 18.6         |  |
| 3           | ZKF17            | 07:16:06 PM     | 22.67         | SR             | 0.039          | 589           | 100.00       | 0.172               | 18.6         |  |
| 4           | ZKF17            | 07:16:12 PM     | 23.84         | SR             | 0.041          | 589           | 100.00       | 0.172               | 18.6         |  |
| 5           | ZKF17            | 07:16:18 PM     | 22.67         | SR             | 0.039          | 589           | 100.00       | 0.172               | 18.5         |  |

**Figure S30.** Optical rotations spectrum of compound 3.

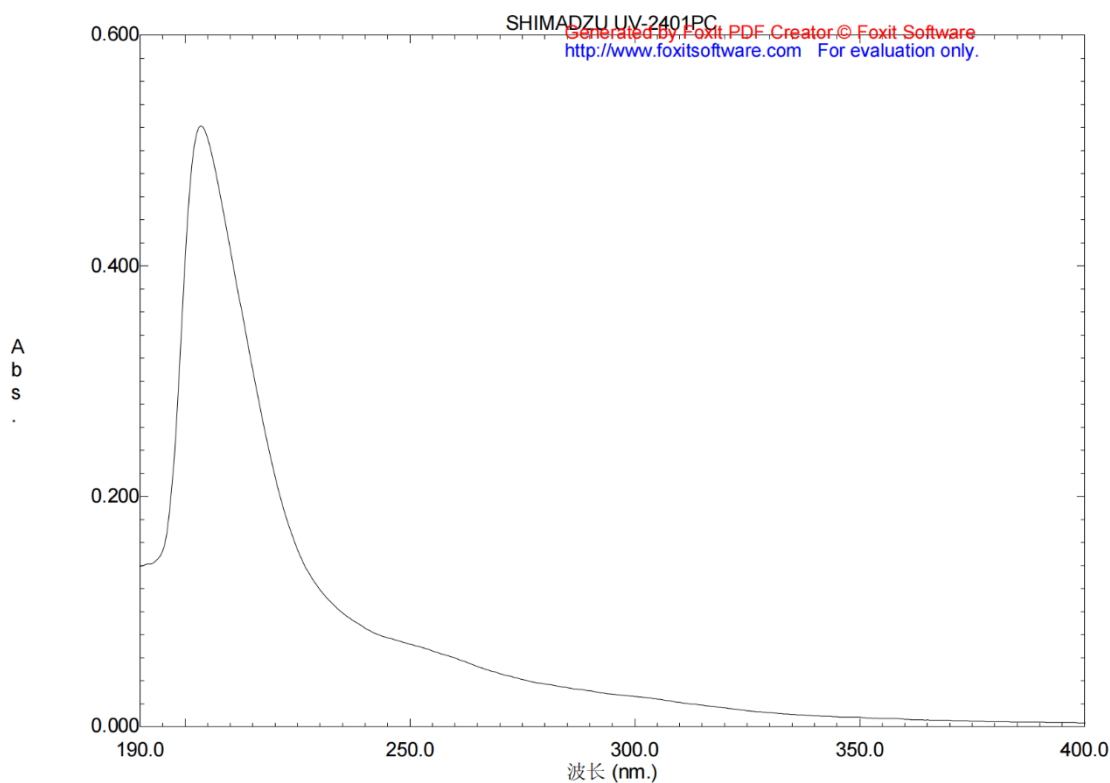

文件名: ZKF17

ZKF17 ———

创建于: 14:44 22-10-20

数据: 原始

样品浓度: 0.0573毫克/毫升

溶剂: 甲醇

测量模式: Abs.

扫描速度: 中速

狭缝: 5.0

采样间隔: 0.5

否. 波长 (nm.) Abs.  
1 203.50 0.5213

**Figure S31.** UV spectrum of compound 3.

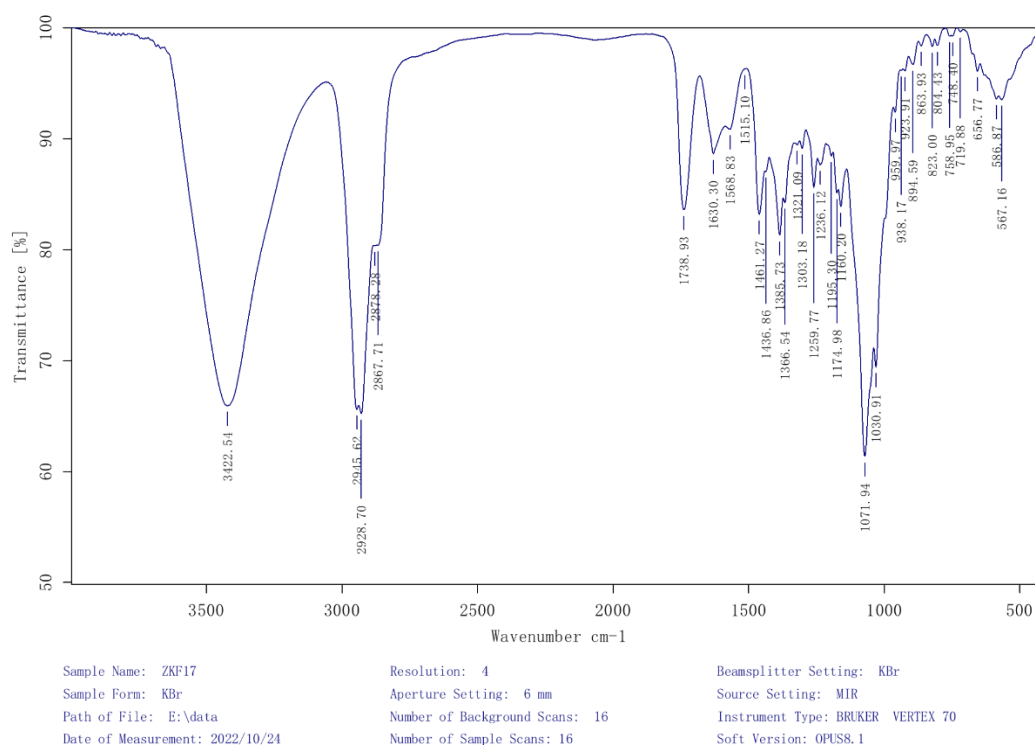

Figure S32. IR spectrum of compound 3.

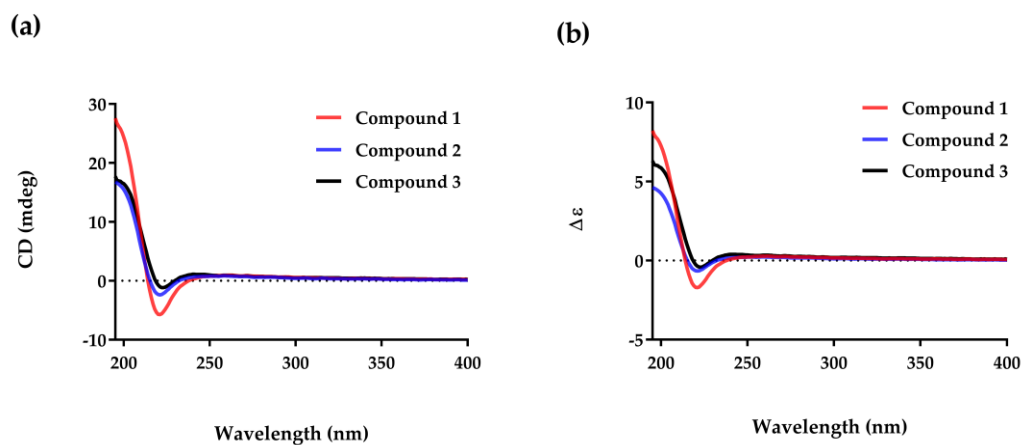

Figure S33. The CD spectra of compounds 1, 2, and 3 in MeOH.

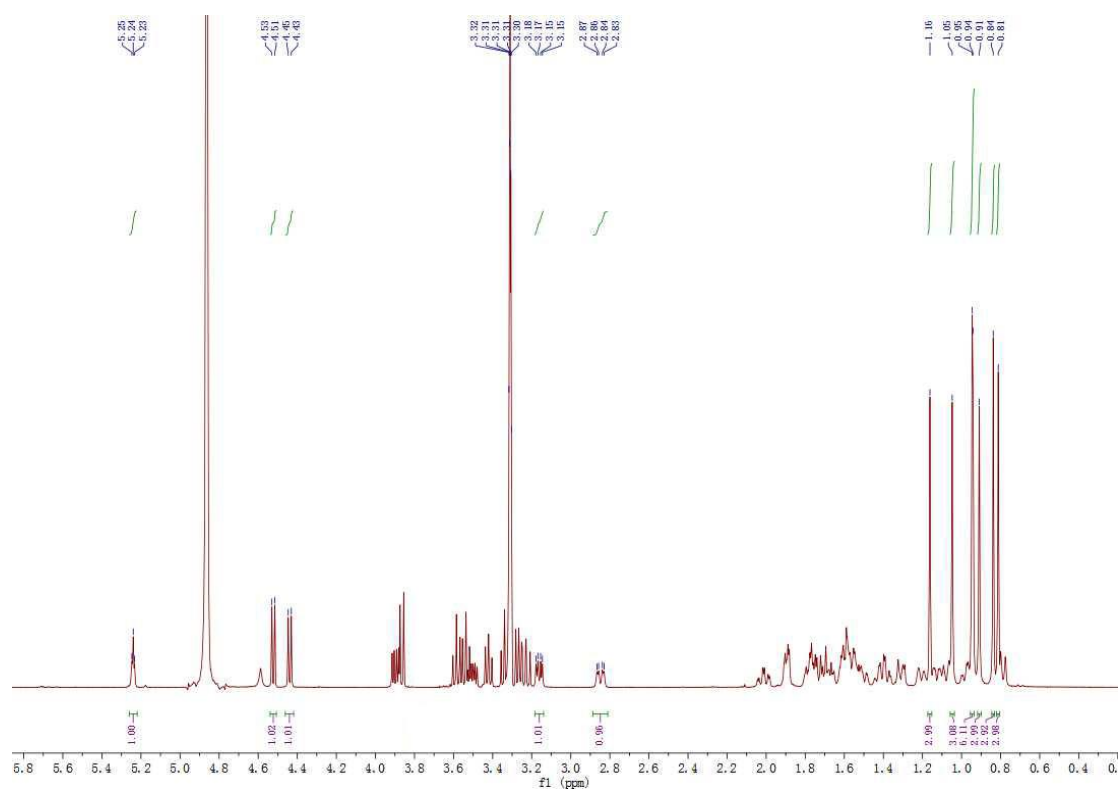

Figure S34. <sup>1</sup>H NMR spectrum of compound 4 (methanol-*d*<sub>4</sub>, 500MHz).

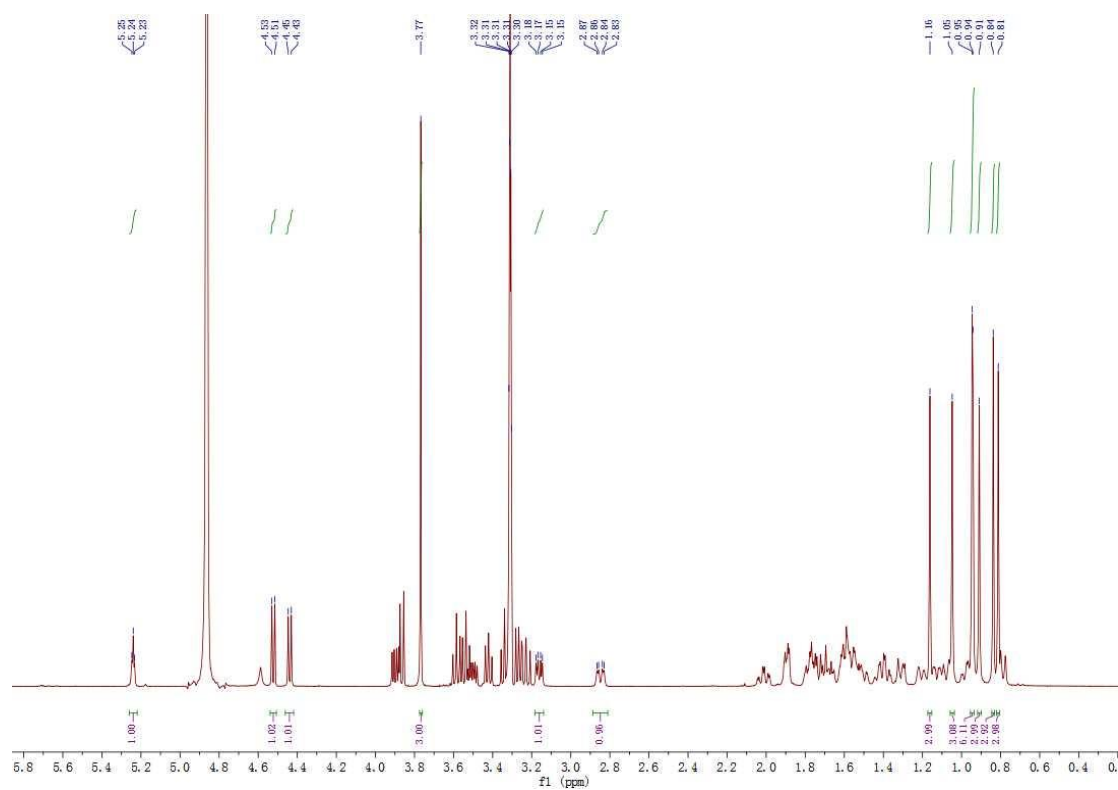

Figure S35. <sup>1</sup>H NMR spectrum of compound 5 (methanol-*d*<sub>4</sub>, 500MHz).

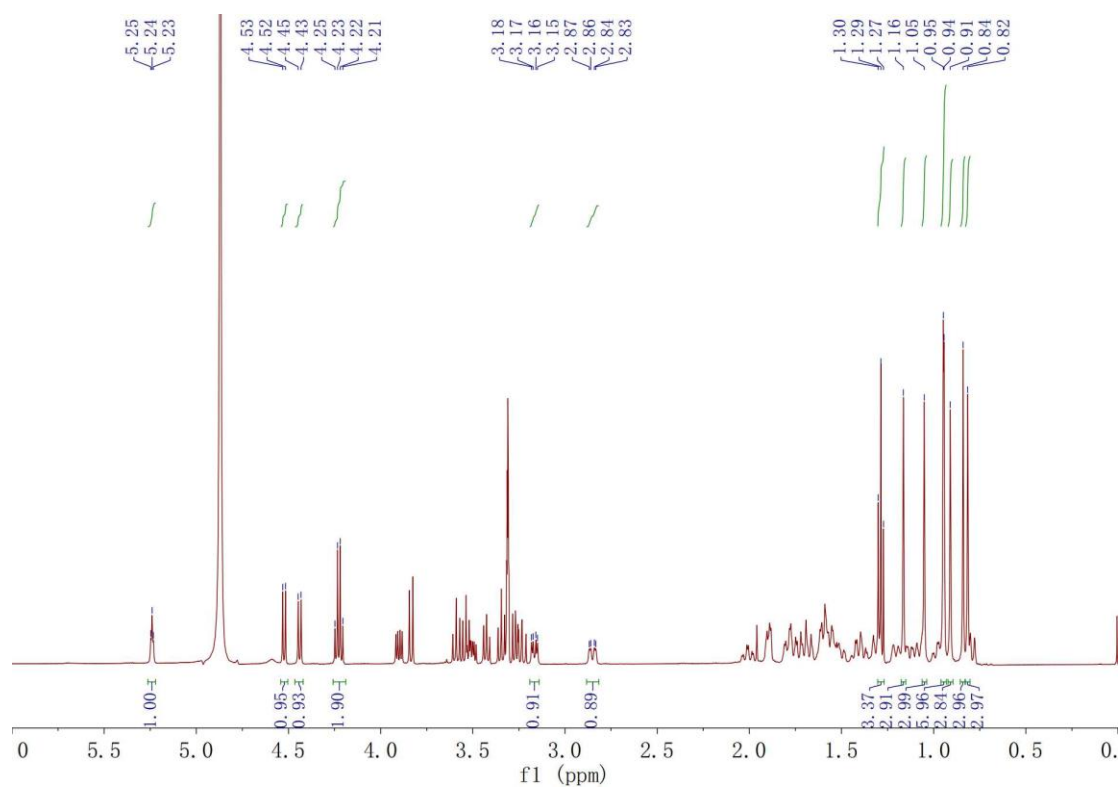

Figure S36. <sup>1</sup>H NMR spectrum of compound 6 (methanol-*d*<sub>4</sub>, 500 MHz).

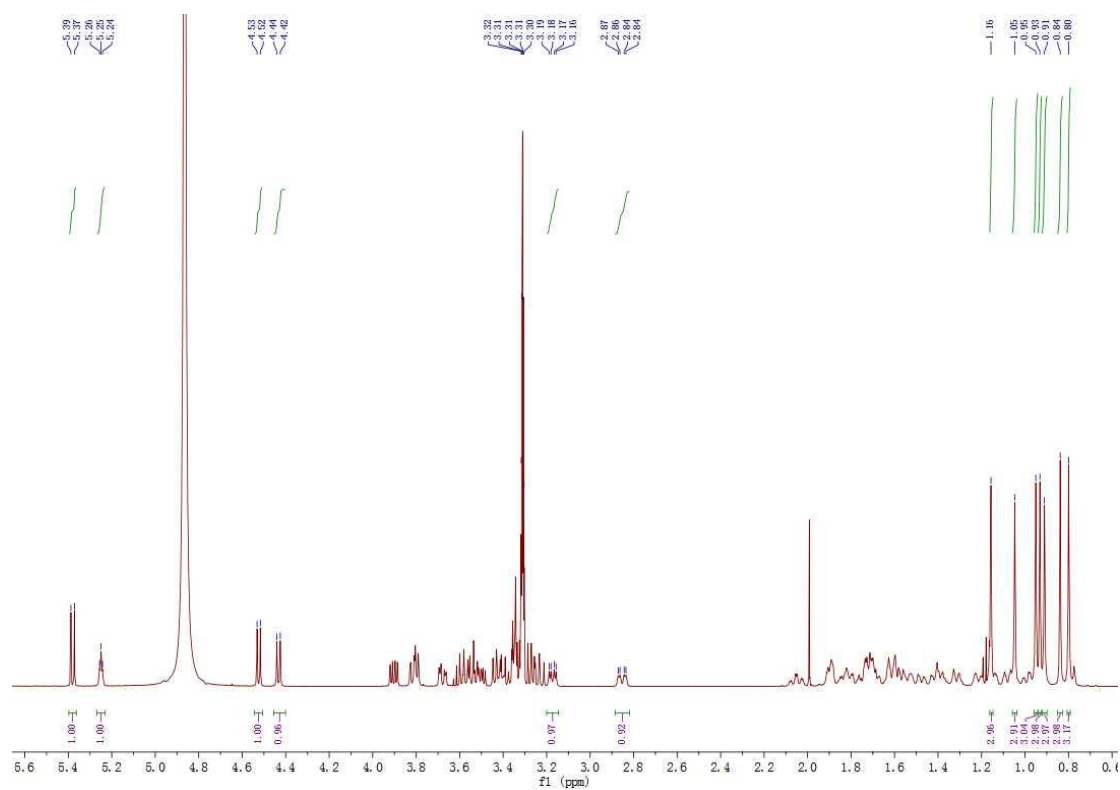

Figure S37. <sup>1</sup>H NMR spectrum of compound 7 (methanol-*d*<sub>4</sub>, 500 MHz).

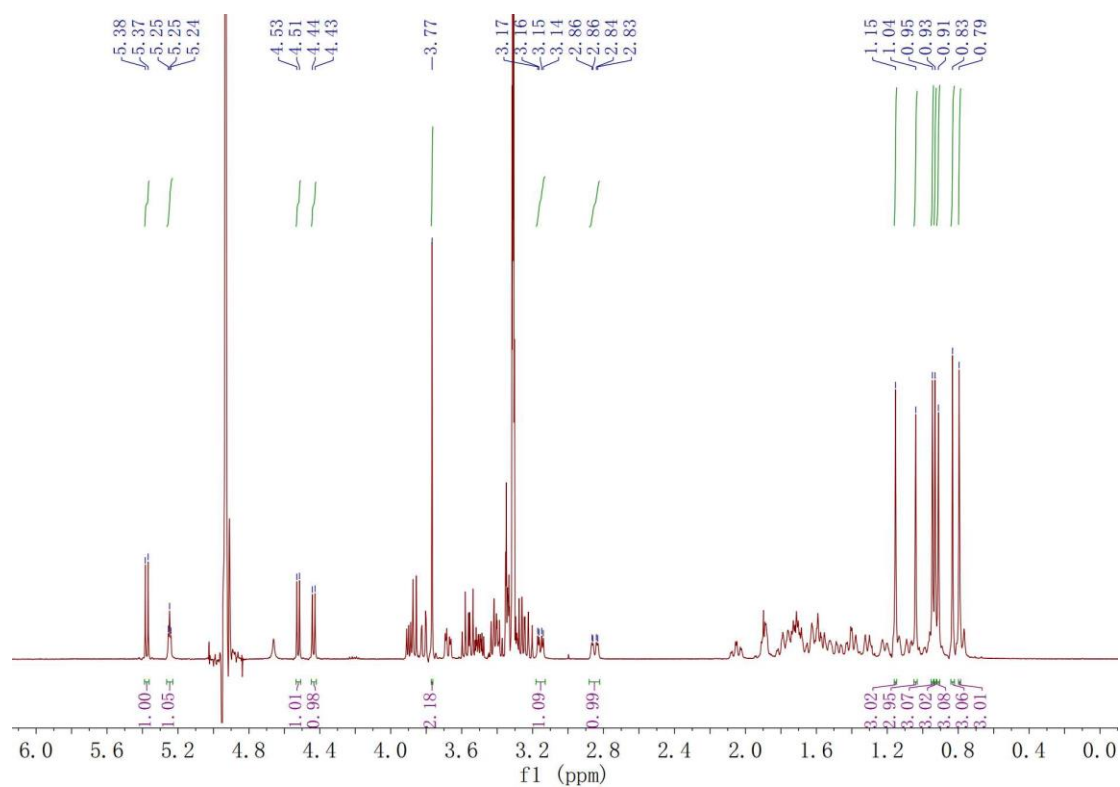

Figure S38. <sup>1</sup>H NMR spectrum of compound 8 (methanol-*d*<sub>4</sub>, 500 MHz).

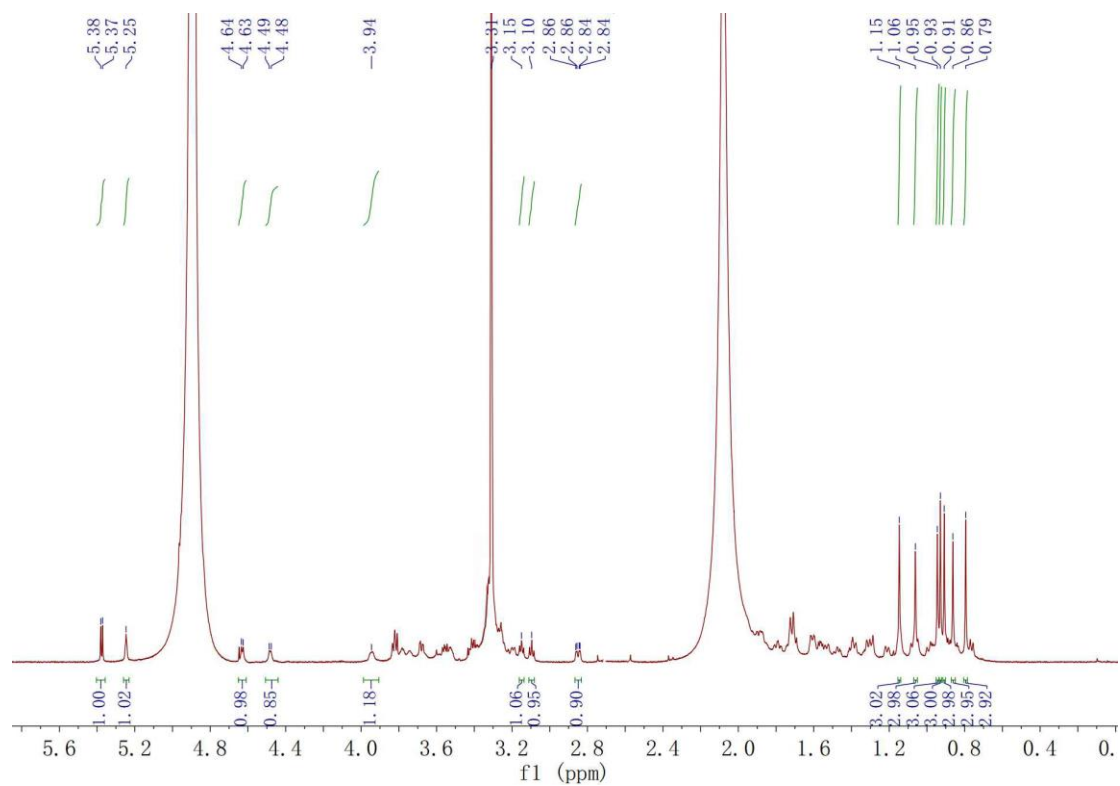

Figure S39. <sup>1</sup>H NMR spectrum of compound 9 (methanol-*d*<sub>4</sub>, 500 MHz).



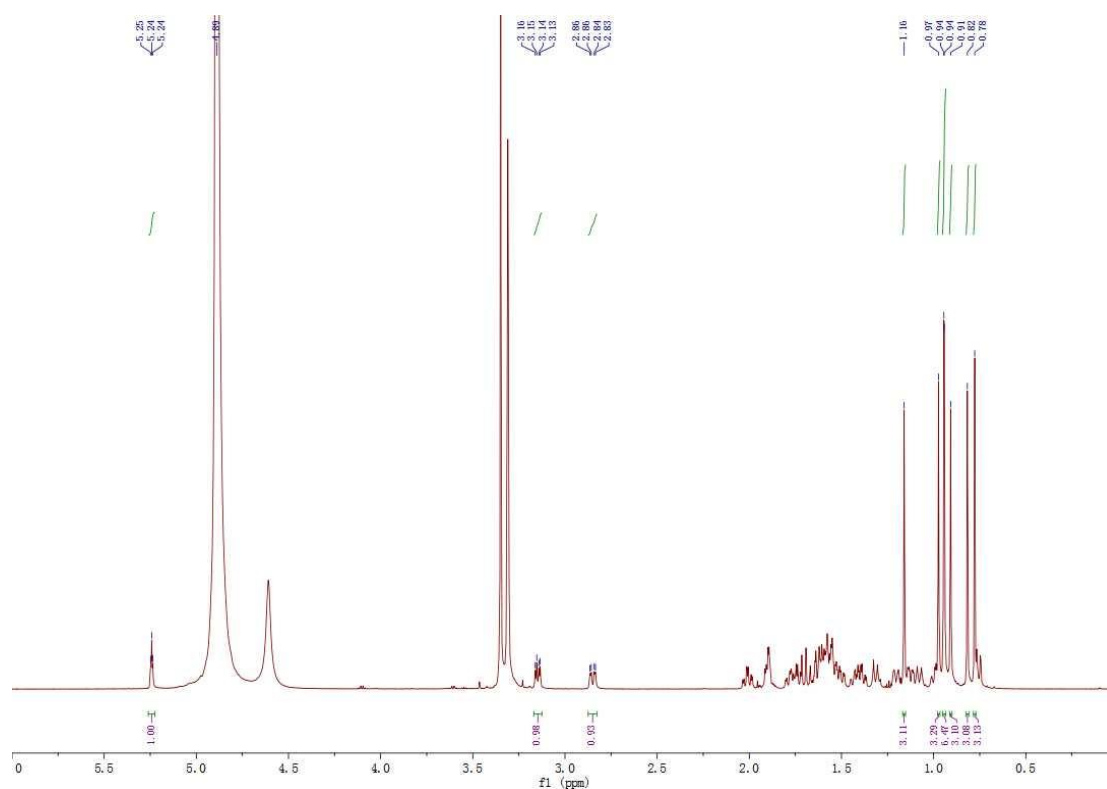

Figure S40. <sup>1</sup>H NMR spectrum of compound **10** (methanol-*d*<sub>4</sub>, 600MHz).

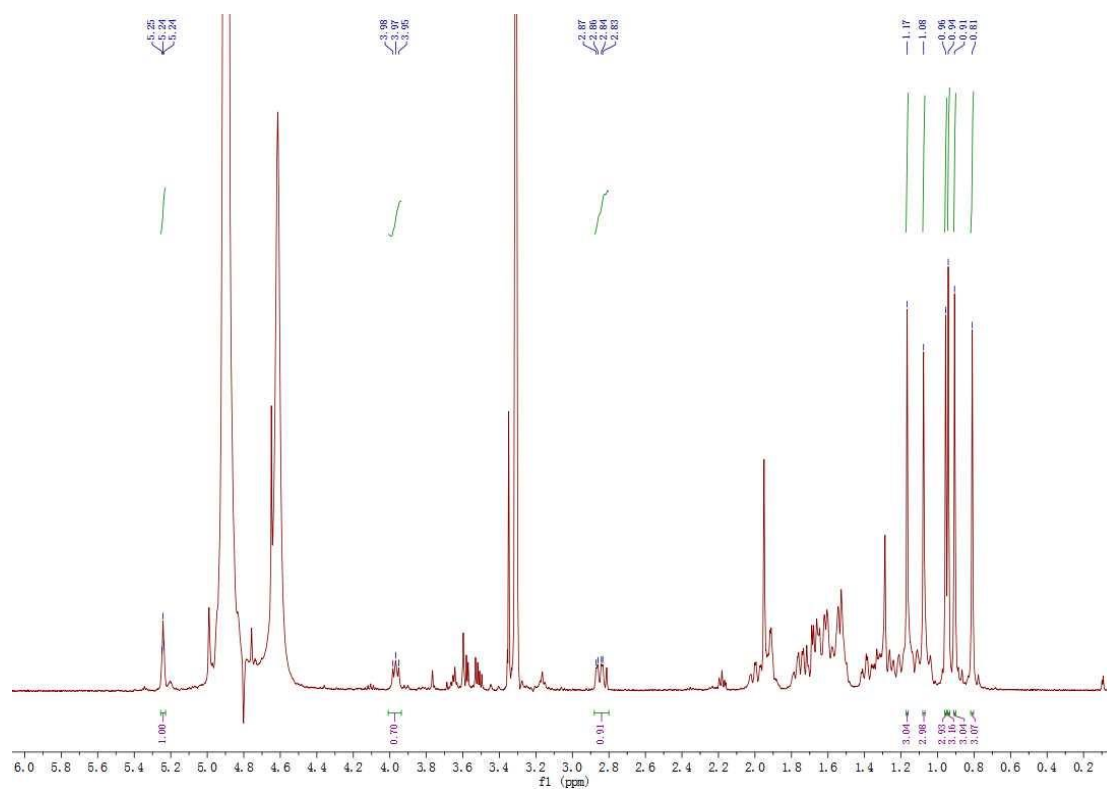

Figure S41. <sup>1</sup>H NMR spectrum of compound **11** (methanol-*d*<sub>4</sub>, 500MHz).

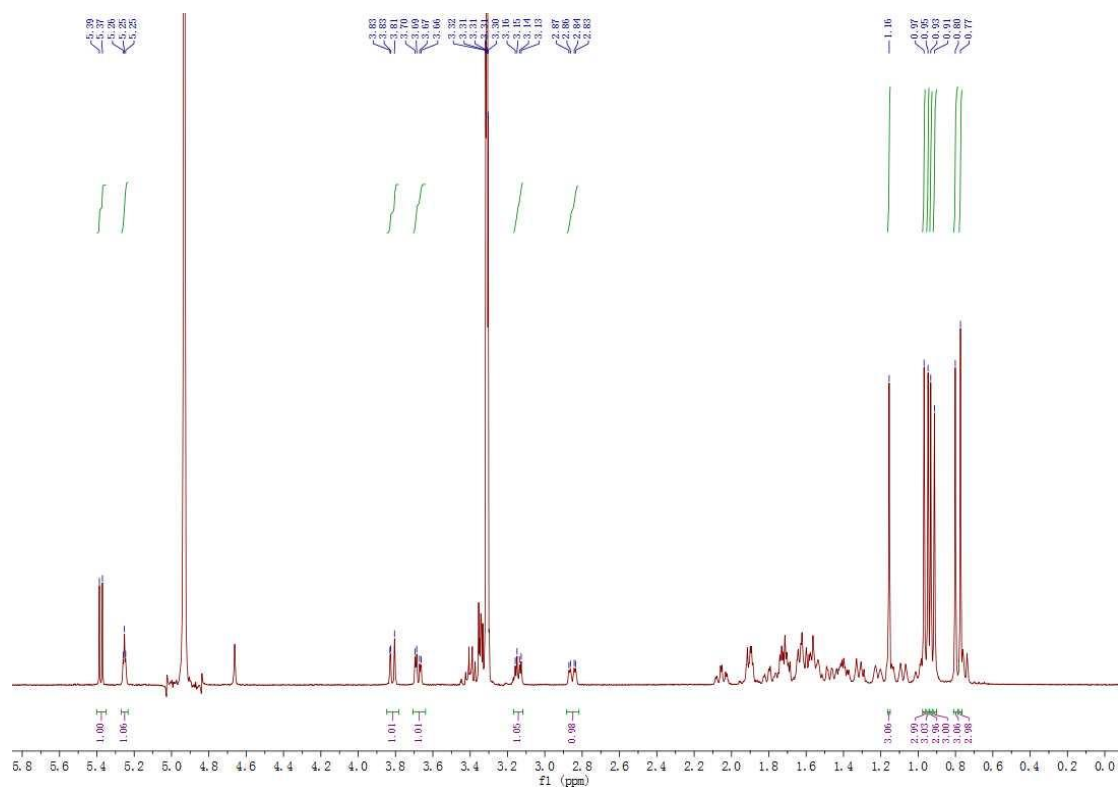

Figure S42. <sup>1</sup>H NMR spectrum of compound 12 (methanol-*d*<sub>4</sub>, 500 MHz).

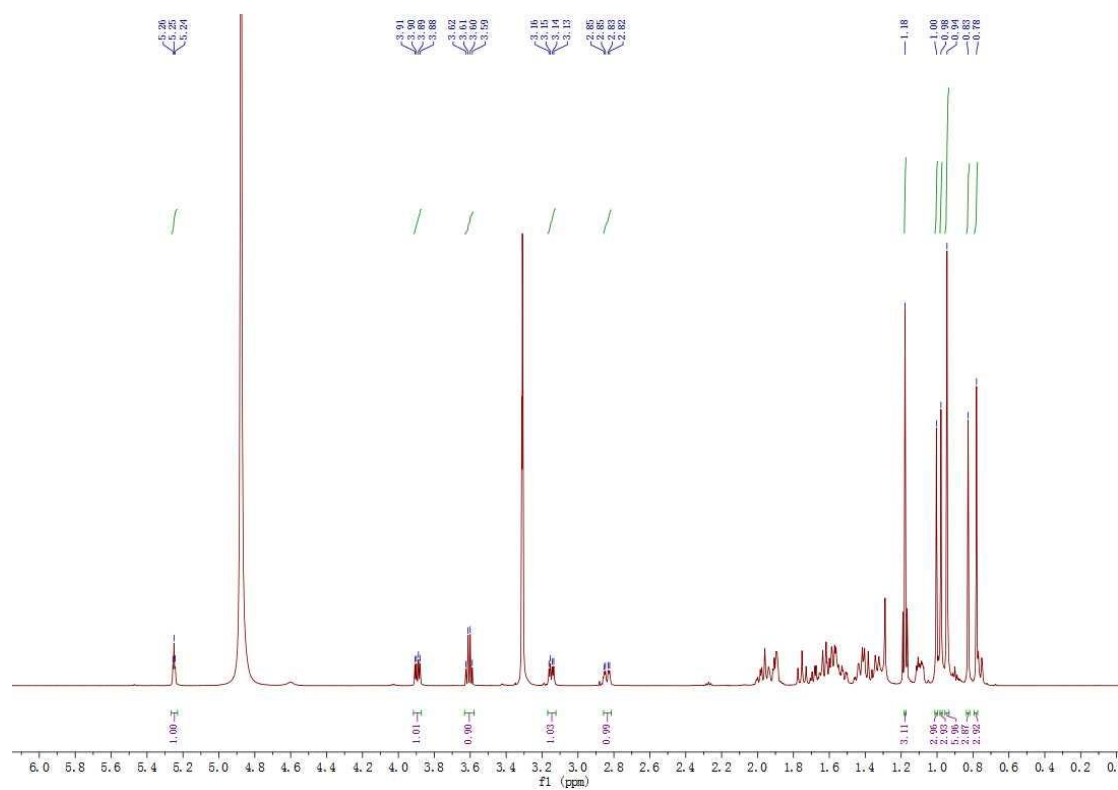

Figure S43. <sup>1</sup>H NMR spectrum of compound 13 (methanol-*d*<sub>4</sub>, 600 MHz).

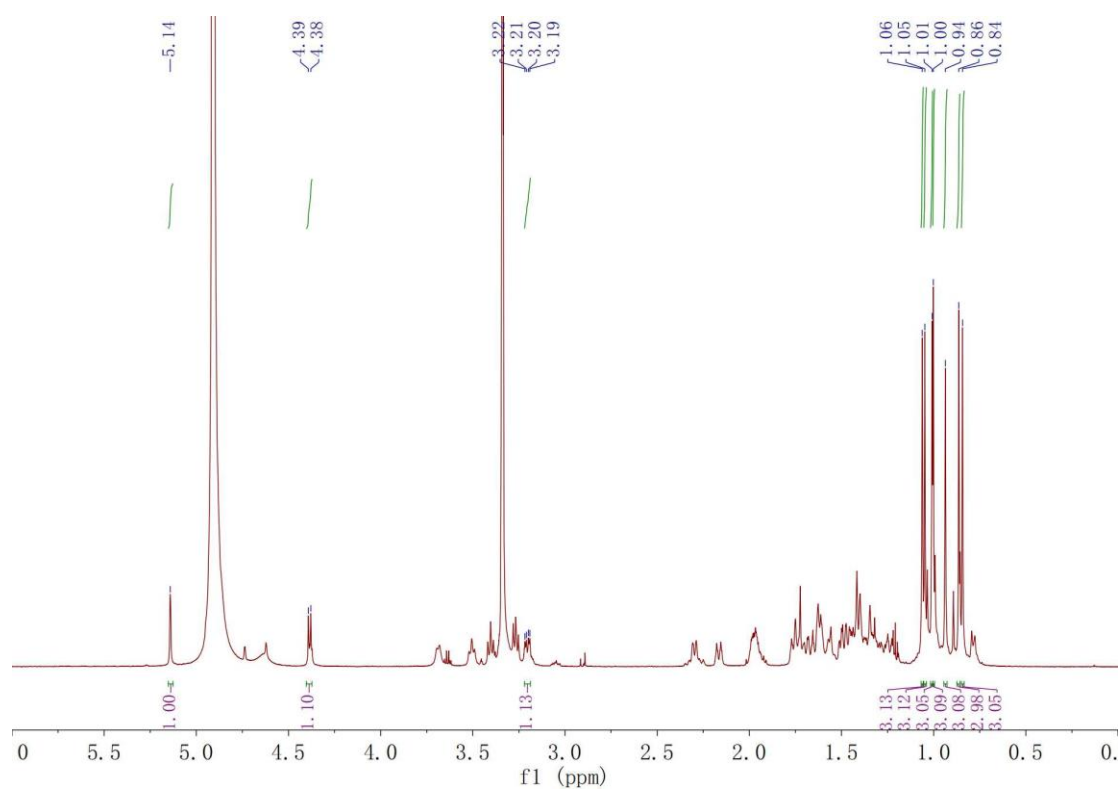

**Figure S44.** <sup>1</sup>H NMR spectrum of compound **14** (methanol-*d*<sub>4</sub>, 600 MHz).

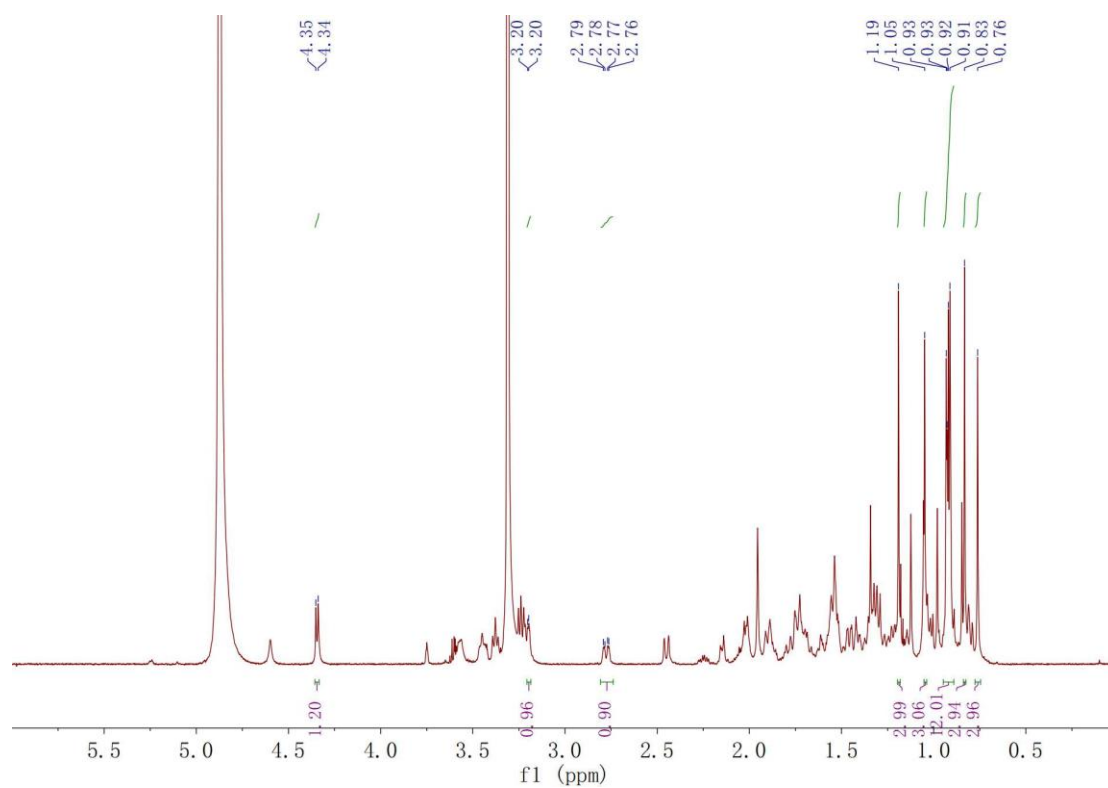

**Figure S45.** <sup>1</sup>H NMR spectrum of compound **15** (methanol-*d*<sub>4</sub>, 600 MHz).

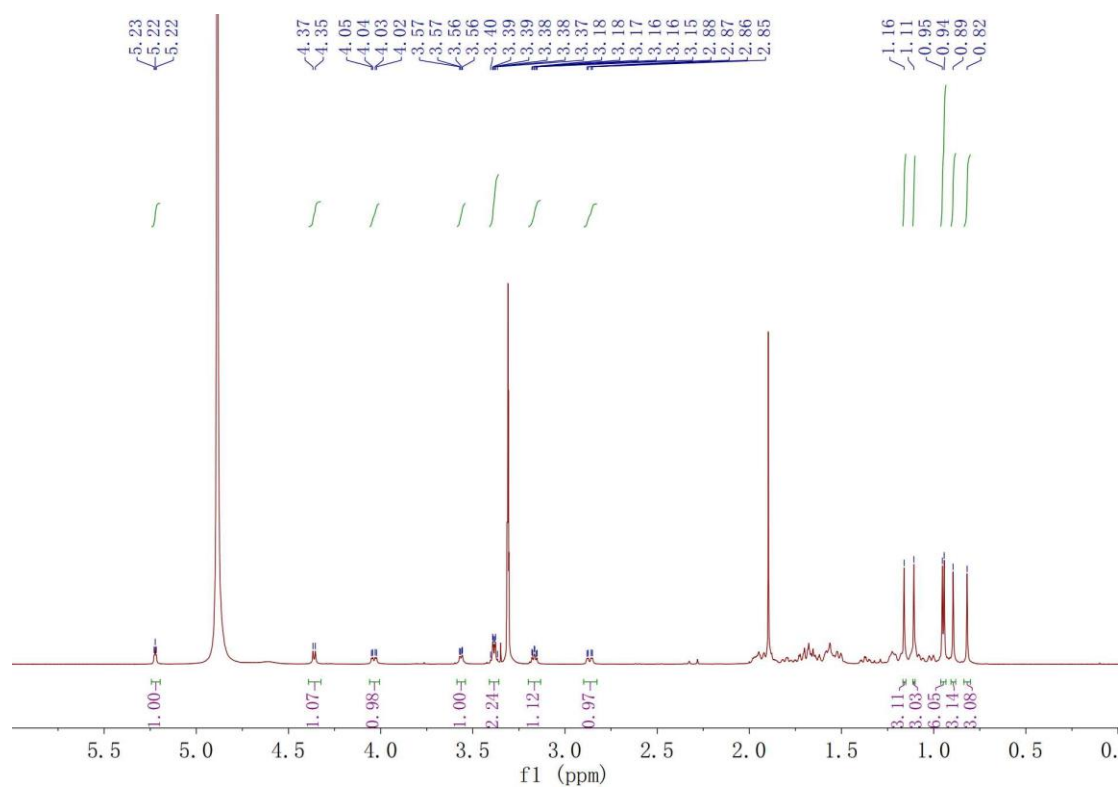

Figure S46. <sup>1</sup>H NMR spectrum of compound 16 (methanol-*d*<sub>4</sub>, 600MHz).

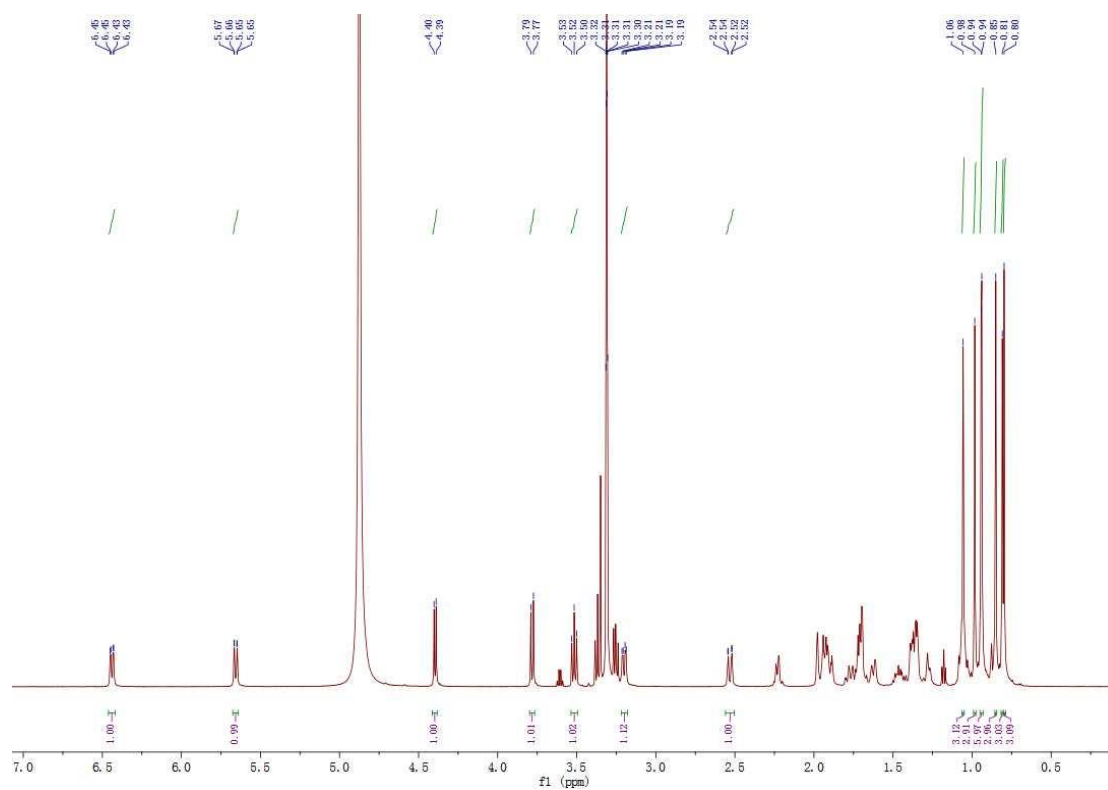

Figure S47. <sup>1</sup>H NMR spectrum of compound 17 (methanol-*d*<sub>4</sub>, 600MHz).

**Table S1.** The data that was used to calculate the IC<sub>50</sub> value for compound 3.

| Concentration (μM) | The absorbance was determined at 405 nm |        |        |
|--------------------|-----------------------------------------|--------|--------|
| 0                  | 1.8958                                  | 1.9019 | 1.8899 |
| 100                | 0.6803                                  | 0.6919 | 0.7170 |
| 50                 | 0.7423                                  | 0.7590 | 0.7817 |
| 25                 | 0.8752                                  | 0.8998 | 0.8730 |
| 12.5               | 0.9834                                  | 0.9814 | 1.0439 |
| 6.25               | 1.2902                                  | 1.2382 | 1.2113 |
| 3.125              | 1.4815                                  | 1.5014 | 1.4437 |
| 1.5625             | 1.6101                                  | 1.5873 | 1.5432 |

**Table S2.** The data that was used to calculate the IC<sub>50</sub> value for compound 9.

| Concentration (μM) | The absorbance was determined at 405 nm |        |        |
|--------------------|-----------------------------------------|--------|--------|
| 0                  | 1.8958                                  | 1.9019 | 1.8899 |
| 100                | 0.4444                                  | 0.4341 | 0.4423 |
| 50                 | 0.4621                                  | 0.4971 | 0.4936 |
| 25                 | 0.6253                                  | 0.6273 | 0.6271 |
| 12.5               | 0.7563                                  | 0.7374 | 0.7484 |
| 6.25               | 0.8887                                  | 0.9370 | 0.9375 |
| 3.125              | 1.0034                                  | 0.9730 | 0.9284 |
| 1.5625             | 1.0695                                  | 1.1973 | 1.1694 |

**Table S3.** The data that was used to calculate the IC<sub>50</sub> value for compound 13.

| Concentration (μM) | The absorbance was determined at 405 nm |        |        |
|--------------------|-----------------------------------------|--------|--------|
| 0                  | 1.3835                                  | 1.3330 | 1.4915 |
| 50                 | 0.4252                                  | 0.4282 | 0.4126 |
| 25                 | 0.4835                                  | 0.5313 | 0.4158 |
| 12.5               | 0.6657                                  | 0.7189 | 0.6798 |
| 6.25               | 1.1589                                  | 1.1940 | 1.2485 |
| 3.125              | 1.3230                                  | 1.3611 | 1.4017 |
| 1.5625             | 1.3461                                  | 1.3679 | 1.4208 |
| 0.78125            | 1.3527                                  | 1.3974 | 1.4329 |

**Table S4.** The data that was used to calculate the IC<sub>50</sub> value for acarbose.

| Concentration (μM) | The absorbance was determined at 405 nm |        |        |
|--------------------|-----------------------------------------|--------|--------|
| 0                  | 2.1073                                  | 2.1278 | 2.1184 |
| 0.012207031        | 0.2813                                  | 0.2694 | 0.2728 |

|             |        |        |        |
|-------------|--------|--------|--------|
| 0.006103516 | 0.4321 | 0.4114 | 0.3998 |
| 0.003051758 | 0.6511 | 0.6945 | 0.6400 |
| 0.001525879 | 0.9629 | 0.9268 | 0.8430 |
| 0.000762939 | 0.8613 | 0.7828 | 0.7353 |
| 0.00038147  | 1.3322 | 1.4116 | 1.2263 |
| 0.000190735 | 1.3945 | 1.5378 | 1.3163 |

**Table S5.** The data that was used to calculate the  $K_m$ ,  $K_i$ , and  $K_i'$  value for compound 3.

| Inhibitor concentration ( $\mu\text{M}$ ),<br>Substrate concentration ( $\mu\text{M}$ ) | At 40 min, the absorbance at<br>405 nm |        |        | At 60 min, the absorbance at<br>405 nm |        |        |
|-----------------------------------------------------------------------------------------|----------------------------------------|--------|--------|----------------------------------------|--------|--------|
| 0, 20                                                                                   | 2.389                                  | 2.3089 | 2.3749 | 3.7430                                 | 3.7856 | 3.7507 |
| 0, 10                                                                                   | 1.9815                                 | 2.0409 | 2.0955 | 3.6091                                 | 3.6436 | 3.6622 |
| 0, 5                                                                                    | 1.4382                                 | 1.5183 | 1.5654 | 2.8114                                 | 2.8911 | 2.9381 |
| 0, 2.5                                                                                  | 0.9304                                 | 0.9691 | 0.9855 | 1.7553                                 | 1.8237 | 1.8345 |
| 0, 1.25                                                                                 | 0.4709                                 | 0.5034 | 0.5031 | 1.0150                                 | 1.0704 | 1.0237 |
| 10, 20                                                                                  | 1.7721                                 | 1.7106 | 1.6819 | 3.0562                                 | 3.0062 | 2.9897 |
| 10, 10                                                                                  | 1.3527                                 | 1.3746 | 1.3316 | 2.6308                                 | 2.6593 | 2.5884 |
| 10, 5                                                                                   | 0.8755                                 | 0.9599 | 0.8015 | 1.7481                                 | 1.9158 | 1.4774 |
| 10, 2.5                                                                                 | 0.6534                                 | 0.6553 | 0.6477 | 1.3342                                 | 1.3436 | 1.3216 |
| 10, 1.25                                                                                | 0.4508                                 | 0.4348 | 0.4538 | 0.8708                                 | 0.8533 | 0.8824 |
| 20, 20                                                                                  | 1.3537                                 | 1.4013 | 1.4327 | 2.5861                                 | 2.6594 | 2.6711 |
| 20, 10                                                                                  | 1.1342                                 | 1.1695 | 1.1576 | 2.2100                                 | 2.2641 | 2.2381 |
| 20, 5                                                                                   | 0.9566                                 | 0.9016 | 0.8443 | 1.7477                                 | 1.7496 | 1.6806 |
| 20, 2.5                                                                                 | 0.5977                                 | 0.5982 | 0.6017 | 1.1970                                 | 1.2155 | 1.1990 |
| 20, 1.25                                                                                | 0.4184                                 | 0.4411 | 0.4376 | 0.8111                                 | 0.8186 | 0.8069 |
| 30, 20                                                                                  | 1.3338                                 | 1.2450 | 1.3039 | 2.5147                                 | 2.4105 | 2.4819 |
| 30, 10                                                                                  | 1.0438                                 | 1.0267 | 1.0430 | 2.0192                                 | 2.0074 | 2.0523 |
| 30, 5                                                                                   | 0.8664                                 | 0.8472 | 0.8355 | 1.6416                                 | 1.6235 | 1.6226 |
| 30, 2.5                                                                                 | 0.5481                                 | 0.5671 | 0.5655 | 1.0793                                 | 1.0715 | 1.1152 |
| 30, 1.25                                                                                | 0.3996                                 | 0.3989 | 0.3910 | 0.7365                                 | 0.7384 | 0.7435 |

**Table S6.** The data that was used to calculate the  $K_m$ ,  $K_i$ , and  $K_i'$  value for compound 9.

| Inhibitor concentration ( $\mu\text{M}$ ),<br>Substrate concentration ( $\mu\text{M}$ ) | At 40 min, the absorbance at<br>405 nm |        |        | At 60 min, the absorbance at<br>405 nm |        |        |
|-----------------------------------------------------------------------------------------|----------------------------------------|--------|--------|----------------------------------------|--------|--------|
| 0, 20                                                                                   | 1.7770                                 | 1.7276 | 1.6815 | 3.1858                                 | 3.1595 | 3.1413 |
| 0, 10                                                                                   | 1.2788                                 | 1.2958 | 1.2796 | 2.7135                                 | 2.7351 | 2.7318 |
| 0, 5                                                                                    | 0.9435                                 | 0.9631 | 0.9686 | 2.0897                                 | 2.1274 | 2.1005 |
| 0, 2.5                                                                                  | 0.6044                                 | 0.6198 | 0.6389 | 1.3440                                 | 1.397  | 1.4151 |

|          |        |        |        |        |        |        |
|----------|--------|--------|--------|--------|--------|--------|
| 0, 1.25  | 0.4016 | 0.4044 | 0.4167 | 0.8927 | 0.8869 | 0.9061 |
| 1, 20    | 1.1836 | 1.1608 | 1.1294 | 2.5202 | 2.4940 | 2.4150 |
| 1, 10    | 0.9300 | 0.9261 | 0.8717 | 2.0569 | 2.0714 | 1.9441 |
| 1, 5     | 0.7181 | 0.6615 | 0.6738 | 1.6108 | 1.4904 | 1.5321 |
| 1, 2.5   | 0.5198 | 0.4789 | 0.4803 | 1.1546 | 1.0906 | 1.0878 |
| 1, 1.25  | 0.3628 | 0.3418 | 0.3450 | 0.7934 | 0.7671 | 0.765  |
| 15, 20   | 0.6873 | 0.6806 | 0.6860 | 1.5269 | 1.5028 | 1.5141 |
| 15, 10   | 0.5631 | 0.5584 | 0.5762 | 1.2792 | 1.2649 | 1.3213 |
| 15, 5    | 0.4552 | 0.4583 | 0.4585 | 1.0338 | 1.045  | 1.0553 |
| 15, 2.5  | 0.3533 | 0.3457 | 0.3541 | 0.7855 | 0.7751 | 0.8129 |
| 15, 1.25 | 0.2585 | 0.2579 | 0.2520 | 0.5664 | 0.5730 | 0.5667 |
| 30, 20   | 0.5788 | 0.5855 | 0.5712 | 1.2477 | 1.2704 | 1.2314 |
| 30, 10   | 0.4741 | 0.4720 | 0.4750 | 1.0277 | 1.0346 | 1.0411 |
| 30, 5    | 0.3895 | 0.3841 | 0.3769 | 0.8658 | 0.8555 | 0.8353 |
| 30, 2.5  | 0.2916 | 0.2954 | 0.2993 | 0.6373 | 0.6469 | 0.6562 |
| 30, 1.25 | 0.2282 | 0.2232 | 0.2260 | 0.4892 | 0.4743 | 0.4793 |

Table S7. The data that was used to calculate the  $K_m$ ,  $K_i$ , and  $K_i'$  value for compound 13.

| Inhibitor concentration ( $\mu\text{M}$ ),<br>Substrate concentration ( $\mu\text{M}$ ) | At 40 min, the absorbance<br>at 405 nm |        |        | At 42 min, the absorbance at<br>405 nm |        |        |
|-----------------------------------------------------------------------------------------|----------------------------------------|--------|--------|----------------------------------------|--------|--------|
| 0, 20                                                                                   | 0.8897                                 | 0.8690 | 0.8560 | 1.1424                                 | 1.1263 | 1.1087 |
| 0, 10                                                                                   | 0.6616                                 | 0.6628 | 0.6686 | 0.8643                                 | 0.8834 | 0.8734 |
| 0, 5                                                                                    | 0.4742                                 | 0.4664 | 0.4818 | 0.6329                                 | 0.6182 | 0.6489 |
| 0, 2.5                                                                                  | 0.3250                                 | 0.3233 | 0.3241 | 0.4391                                 | 0.4361 | 0.4332 |
| 0, 1.25                                                                                 | 0.2127                                 | 0.2137 | 0.2167 | 0.2775                                 | 0.2797 | 0.2780 |
| 5, 20                                                                                   | 0.6681                                 | 0.6589 | 0.6944 | 0.8635                                 | 0.8479 | 0.8889 |
| 5, 10                                                                                   | 0.4885                                 | 0.4832 | 0.5273 | 0.6347                                 | 0.6313 | 0.6835 |
| 5, 5                                                                                    | 0.3071                                 | 0.3248 | 0.3327 | 0.4012                                 | 0.4300 | 0.4372 |
| 5, 2.5                                                                                  | 0.2150                                 | 0.2199 | 0.2261 | 0.2822                                 | 0.2910 | 0.2993 |
| 5, 1.25                                                                                 | 0.1505                                 | 0.1474 | 0.1521 | 0.1947                                 | 0.1927 | 0.1958 |
| 10, 20                                                                                  | 0.4291                                 | 0.4068 | 0.4258 | 0.5371                                 | 0.5130 | 0.5350 |
| 10, 10                                                                                  | 0.3402                                 | 0.3144 | 0.3391 | 0.4314                                 | 0.3998 | 0.4320 |
| 10, 5                                                                                   | 0.2353                                 | 0.2200 | 0.2359 | 0.2985                                 | 0.2826 | 0.3006 |
| 10, 2.5                                                                                 | 0.1573                                 | 0.1522 | 0.1615 | 0.2037                                 | 0.1937 | 0.2067 |
| 10, 1.25                                                                                | 0.1138                                 | 0.1106 | 0.1182 | 0.1411                                 | 0.1389 | 0.1479 |
| 20, 20                                                                                  | 0.3343                                 | 0.3345 | 0.3517 | 0.4152                                 | 0.4173 | 0.4392 |
| 20, 10                                                                                  | 0.2677                                 | 0.2821 | 0.2870 | 0.3361                                 | 0.3527 | 0.3592 |
| 20, 5                                                                                   | 0.1987                                 | 0.1952 | 0.2055 | 0.2515                                 | 0.2454 | 0.2578 |
| 20, 2.5                                                                                 | 0.1429                                 | 0.1453 | 0.1436 | 0.1821                                 | 0.1830 | 0.1798 |
| 20, 1.25                                                                                | 0.1093                                 | 0.1023 | 0.1057 | 0.1342                                 | 0.1252 | 0.1290 |
